# Supplementary material
Source: publisher figshare collection journal article supplement (https://acs.figshare.com/ndownloader/files/4768771)
Supplement: Supplementary file 1 [file 4768771]

 
data_1-ocomsbcl2-ruzic 
 
_audit_creation_method            SHELXL-97 
_chemical_name_systematic 
; 
 ? 
; 
_chemical_name_common             ? 
_chemical_melting_point           ? 
_chemical_formula_moiety          'C10 H13 Cl2 O2 Sb' 
_chemical_formula_sum 
 'C10 H13 Cl2 O2 Sb' 
_chemical_formula_weight          357.85 
_chemical_compound_source         'synthesized by the authors'
 
loop_ 
 _atom_type_symbol 
 _atom_type_description 
 _atom_type_scat_dispersion_real 
 _atom_type_scat_dispersion_imag 
 _atom_type_scat_source 
 'C'  'C'   0.0033   0.0016 
 'International Tables Vol C Tables 4.2.6.8 and 6.1.1.4' 
 'H'  'H'   0.0000   0.0000 
 'International Tables Vol C Tables 4.2.6.8 and 6.1.1.4' 
 'O'  'O'   0.0106   0.0060 
 'International Tables Vol C Tables 4.2.6.8 and 6.1.1.4' 
 'Cl'  'Cl'   0.1484   0.1585 
 'International Tables Vol C Tables 4.2.6.8 and 6.1.1.4' 
 'Sb'  'Sb'  -0.5866   1.5461 
 'International Tables Vol C Tables 4.2.6.8 and 6.1.1.4' 
 
_symmetry_cell_setting            orthorhombic 
_symmetry_space_group_name_H-M    'P b c a' 
_symmetry_space_group_name_Hall   '-P 2ac 2ab'
 
loop_ 
 _symmetry_equiv_pos_as_xyz 
 'x, y, z' 
 '-x+1/2, -y, z+1/2' 
 'x+1/2, -y+1/2, -z' 
 '-x, y+1/2, -z+1/2' 
 '-x, -y, -z' 
 'x-1/2, y, -z-1/2' 
 '-x-1/2, y-1/2, z' 
 'x, -y-1/2, z-1/2' 
 
_cell_length_a                    13.33400(10) 
_cell_length_b                    8.5580(2) 
_cell_length_c                    22.0360(4) 
_cell_angle_alpha                 90.00 
_cell_angle_beta                  90.00 
_cell_angle_gamma                 90.00 
_cell_volume                      2514.58(8) 
_cell_formula_units_Z             8 
_cell_measurement_temperature     150(2) 
_cell_measurement_reflns_used     37773 
_cell_measurement_theta_min       1 
_cell_measurement_theta_max       27.5 
 
_exptl_crystal_description        bar 
_exptl_crystal_colour             colourless 
_exptl_crystal_size_max           0.4 
_exptl_crystal_size_mid           0.15 
_exptl_crystal_size_min           0.05 
_exptl_crystal_density_meas       ? 
_exptl_crystal_density_diffrn     1.891 
_exptl_crystal_density_method     'not measured' 
_exptl_crystal_F_000              1392 
_exptl_absorpt_coefficient_mu     2.597 
_exptl_absorpt_correction_type    gaussian 
_exptl_absorpt_correction_T_min   0.458 
_exptl_absorpt_correction_T_max   0.876 
_exptl_absorpt_process_details    '(Coppens, 1970)' 
 
_exptl_special_details 
; 
 Coppens, P. (1970). Acta Cryst. A26, 71-83.
; 
 
_diffrn_ambient_temperature       150(2) 
_diffrn_radiation_wavelength      0.71073 
_diffrn_radiation_type            MoK\a 
_diffrn_radiation_source          'fine-focus sealed tube' 
_diffrn_radiation_monochromator   graphite 
_diffrn_measurement_device_type   'Nonius KappaCCD area detector' 
_diffrn_measurement_method        '\f and \w scans to fill the Ewald sphere' 
_diffrn_detector_area_resol_mean  9.091 
_diffrn_standards_number          0 
_diffrn_standards_interval_count  ? 
_diffrn_standards_interval_time   ? 
_diffrn_standards_decay_%         ? 
_diffrn_reflns_number             38448 
_diffrn_reflns_av_R_equivalents   0.0571 
_diffrn_reflns_av_sigmaI/netI     0.0206 
_diffrn_reflns_limit_h_min        -17 
_diffrn_reflns_limit_h_max        17 
_diffrn_reflns_limit_k_min        -11 
_diffrn_reflns_limit_k_max        11 
_diffrn_reflns_limit_l_min        -28 
_diffrn_reflns_limit_l_max        28 
_diffrn_reflns_theta_min          1.85 
_diffrn_reflns_theta_max          27.48 
_reflns_number_total              2885 
_reflns_number_gt                 2474 
_reflns_threshold_expression      I>2\s(I) 
 
_computing_data_collection         
 'COLLECT (Hooft, 1998) and DENZO (Otwinowski & Minor, 1997)'
_computing_cell_refinement        'COLLECT and DENZO' 
_computing_data_reduction         'COLLECT and DENZO' 
_computing_structure_solution     'SIR92 (Altomare et al., 1994)' 
_computing_structure_refinement   'SHELXL-97 (Sheldrick, 1997)' 
_computing_molecular_graphics     ? 
_computing_publication_material   ? 
 
_refine_special_details 
; 
 Refinement of F^2^ against ALL reflections.  The weighted R-factor wR and 
 goodness of fit S are based on F^2^, conventional R-factors R are based 
 on F, with F set to zero for negative F^2^. The threshold expression of 
 F^2^ > 2sigma(F^2^) is used only for calculating R-factors(gt) etc. and is 
 not relevant to the choice of reflections for refinement.  R-factors based 
 on F^2^ are statistically about twice as large as those based on F, and R- 
 factors based on ALL data will be even larger. 
; 
 
_refine_ls_structure_factor_coef  Fsqd  
_refine_ls_matrix_type            full 
_refine_ls_weighting_scheme       calc  
_refine_ls_weighting_details 
 'calc w=1/[\s^2^(Fo^2^)+(0.0292P)^2^+2.9583P] where P=(Fo^2^+2Fc^2^)/3' 
_atom_sites_solution_primary      direct 
_atom_sites_solution_secondary    difmap 
_atom_sites_solution_hydrogens    geom 
_refine_ls_hydrogen_treatment     constr 
_refine_ls_extinction_method      none 
_refine_ls_extinction_coef        ? 
_refine_ls_number_reflns          2885 
_refine_ls_number_parameters      138 
_refine_ls_number_restraints      0 
_refine_ls_R_factor_all           0.0342 
_refine_ls_R_factor_gt            0.0261 
_refine_ls_wR_factor_ref          0.0652 
_refine_ls_wR_factor_gt           0.0600 
_refine_ls_goodness_of_fit_ref    1.140 
_refine_ls_restrained_S_all       1.140 
_refine_ls_shift/su_max           0.002 
_refine_ls_shift/su_mean          0.000 
 
loop_ 
 _atom_site_label 
 _atom_site_type_symbol 
 _atom_site_fract_x 
 _atom_site_fract_y 
 _atom_site_fract_z 
 _atom_site_U_iso_or_equiv 
 _atom_site_adp_type 
 _atom_site_occupancy 
 _atom_site_symmetry_multiplicity 
 _atom_site_calc_flag 
 _atom_site_refinement_flags 
 _atom_site_disorder_assembly 
 _atom_site_disorder_group 
Sb1 Sb 0.542924(12) 0.02134(2) 0.580292(8) 0.02019(7) Uani 1 1 d . . . 
Cl1 Cl 0.55598(5) -0.26147(8) 0.58865(4) 0.03229(17) Uani 1 1 d . . . 
Cl2 Cl 0.36595(5) -0.02096(8) 0.60554(4) 0.02805(15) Uani 1 1 d . . . 
O1 O 0.72950(14) -0.0253(2) 0.58659(9) 0.0237(4) Uani 1 1 d . . . 
O2 O 0.47956(13) 0.2917(2) 0.61471(9) 0.0241(4) Uani 1 1 d . . . 
C1 C 0.59566(19) 0.0758(3) 0.66970(12) 0.0195(5) Uani 1 1 d . . . 
C2 C 0.6873(2) 0.0147(3) 0.68955(13) 0.0223(5) Uani 1 1 d . . . 
C3 C 0.7223(2) 0.0518(3) 0.74740(13) 0.0261(6) Uani 1 1 d . . . 
H3 H 0.7824 0.0092 0.7611 0.031 Uiso 1 1 calc R . . 
C4 C 0.6684(2) 0.1517(3) 0.78455(13) 0.0283(6) Uani 1 1 d . . . 
H4 H 0.6902 0.1713 0.8239 0.034 Uiso 1 1 calc R . . 
C5 C 0.5818(2) 0.2225(3) 0.76303(13) 0.0258(6) Uani 1 1 d . . . 
H5 H 0.5476 0.2937 0.7873 0.031 Uiso 1 1 calc R . . 
C6 C 0.54587(18) 0.1873(3) 0.70523(12) 0.0209(5) Uani 1 1 d . . . 
C7 C 0.7518(2) -0.0785(3) 0.64675(13) 0.0266(6) Uani 1 1 d . . . 
H7A H 0.8222 -0.0624 0.6559 0.032 Uiso 1 1 calc R . . 
H7B H 0.7370 -0.1891 0.6505 0.032 Uiso 1 1 calc R . . 
C8 C 0.7830(2) -0.1111(3) 0.54076(14) 0.0305(6) Uani 1 1 d . . . 
H8A H 0.8538 -0.0961 0.5461 0.046 Uiso 1 1 calc R . . 
H8B H 0.7635 -0.0742 0.5013 0.046 Uiso 1 1 calc R . . 
H8C H 0.7674 -0.2202 0.5442 0.046 Uiso 1 1 calc R . . 
C9 C 0.46093(19) 0.2804(3) 0.67886(13) 0.0259(6) Uani 1 1 d . . . 
H9A H 0.3975 0.2284 0.6863 0.031 Uiso 1 1 calc R . . 
H9B H 0.4585 0.3836 0.6970 0.031 Uiso 1 1 calc R . . 
C10 C 0.4018(2) 0.3740(4) 0.58283(14) 0.0312(7) Uani 1 1 d . . . 
H10A H 0.3384 0.3248 0.5906 0.047 Uiso 1 1 calc R . . 
H10B H 0.4154 0.3716 0.5401 0.047 Uiso 1 1 calc R . . 
H10C H 0.3996 0.4804 0.5965 0.047 Uiso 1 1 calc R . . 
 
loop_ 
 _atom_site_aniso_label 
 _atom_site_aniso_U_11 
 _atom_site_aniso_U_22 
 _atom_site_aniso_U_33 
 _atom_site_aniso_U_23 
 _atom_site_aniso_U_13 
 _atom_site_aniso_U_12 
Sb1 0.01923(11) 0.02355(11) 0.01779(11) -0.00025(6) -0.00011(6) -0.00276(6) 
Cl1 0.0344(4) 0.0214(3) 0.0411(4) -0.0061(3) 0.0066(3) -0.0042(3) 
Cl2 0.0187(3) 0.0347(4) 0.0307(4) 0.0019(3) -0.0005(3) -0.0049(2) 
O1 0.0222(10) 0.0218(9) 0.0270(11) 0.0029(7) 0.0002(8) 0.0054(7) 
O2 0.0206(9) 0.0273(10) 0.0244(10) 0.0026(8) -0.0005(8) 0.0047(7) 
C1 0.0206(12) 0.0192(11) 0.0188(13) 0.0013(10) -0.0006(10) -0.0038(10) 
C2 0.0234(13) 0.0185(12) 0.0249(14) 0.0036(10) -0.0015(11) -0.0002(10) 
C3 0.0258(13) 0.0229(13) 0.0294(16) 0.0043(11) -0.0069(12) -0.0025(10) 
C4 0.0350(15) 0.0268(14) 0.0231(14) 0.0020(11) -0.0068(12) -0.0087(12) 
C5 0.0293(14) 0.0245(13) 0.0236(15) -0.0038(11) 0.0021(11) -0.0050(11) 
C6 0.0203(13) 0.0209(13) 0.0215(14) -0.0008(10) 0.0014(10) -0.0032(9) 
C7 0.0256(13) 0.0252(13) 0.0288(15) 0.0046(12) -0.0018(11) 0.0056(11) 
C8 0.0280(15) 0.0305(15) 0.0331(17) -0.0008(12) 0.0073(12) 0.0063(11) 
C9 0.0208(13) 0.0285(14) 0.0283(15) -0.0036(11) 0.0030(11) 0.0024(10) 
C10 0.0264(14) 0.0307(15) 0.0365(18) 0.0049(12) -0.0040(12) 0.0072(12) 
 
_geom_special_details 
; 
 All esds (except the esd in the dihedral angle between two l.s. planes) 
 are estimated using the full covariance matrix.  The cell esds are taken 
 into account individually in the estimation of esds in distances, angles 
 and torsion angles; correlations between esds in cell parameters are only 
 used when they are defined by crystal symmetry.  An approximate (isotropic) 
 treatment of cell esds is used for estimating esds involving l.s. planes. 
; 
 
loop_ 
 _geom_bond_atom_site_label_1 
 _geom_bond_atom_site_label_2 
 _geom_bond_distance 
 _geom_bond_site_symmetry_2 
 _geom_bond_publ_flag 
Sb1 C1 2.143(3) . ? 
Sb1 Cl1 2.4335(8) . ? 
Sb1 Cl2 2.4513(7) . ? 
Sb1 O1 2.5234(19) . ? 
O1 C7 1.433(3) . ? 
O1 C8 1.438(3) . ? 
O2 C10 1.437(3) . ? 
O2 C9 1.438(3) . ? 
C1 C2 1.399(4) . ? 
C1 C6 1.402(4) . ? 
C2 C3 1.394(4) . ? 
C2 C7 1.505(4) . ? 
C3 C4 1.385(4) . ? 
C3 H3 0.9300 . ? 
C4 C5 1.388(4) . ? 
C4 H4 0.9300 . ? 
C5 C6 1.394(4) . ? 
C5 H5 0.9300 . ? 
C6 C9 1.502(4) . ? 
C7 H7A 0.9700 . ? 
C7 H7B 0.9700 . ? 
C8 H8A 0.9600 . ? 
C8 H8B 0.9600 . ? 
C8 H8C 0.9600 . ? 
C9 H9A 0.9700 . ? 
C9 H9B 0.9700 . ? 
C10 H10A 0.9600 . ? 
C10 H10B 0.9600 . ? 
C10 H10C 0.9600 . ? 
 
loop_ 
 _geom_angle_atom_site_label_1 
 _geom_angle_atom_site_label_2 
 _geom_angle_atom_site_label_3 
 _geom_angle 
 _geom_angle_site_symmetry_1 
 _geom_angle_site_symmetry_3 
 _geom_angle_publ_flag 
C1 Sb1 Cl1 97.08(7) . . ? 
C1 Sb1 Cl2 98.01(7) . . ? 
Cl1 Sb1 Cl2 84.54(2) . . ? 
C1 Sb1 O1 70.14(8) . . ? 
Cl1 Sb1 O1 76.58(4) . . ? 
Cl2 Sb1 O1 155.95(5) . . ? 
C7 O1 C8 112.6(2) . . ? 
C7 O1 Sb1 107.79(15) . . ? 
C8 O1 Sb1 122.07(16) . . ? 
C10 O2 C9 112.9(2) . . ? 
C2 C1 C6 119.6(2) . . ? 
C2 C1 Sb1 119.52(19) . . ? 
C6 C1 Sb1 120.41(18) . . ? 
C3 C2 C1 119.6(3) . . ? 
C3 C2 C7 120.2(2) . . ? 
C1 C2 C7 120.1(2) . . ? 
C4 C3 C2 120.5(3) . . ? 
C4 C3 H3 119.8 . . ? 
C2 C3 H3 119.8 . . ? 
C3 C4 C5 120.0(3) . . ? 
C3 C4 H4 120.0 . . ? 
C5 C4 H4 120.0 . . ? 
C4 C5 C6 120.3(3) . . ? 
C4 C5 H5 119.9 . . ? 
C6 C5 H5 119.9 . . ? 
C5 C6 C1 119.7(2) . . ? 
C5 C6 C9 119.9(2) . . ? 
C1 C6 C9 120.1(2) . . ? 
O1 C7 C2 107.0(2) . . ? 
O1 C7 H7A 110.3 . . ? 
C2 C7 H7A 110.3 . . ? 
O1 C7 H7B 110.3 . . ? 
C2 C7 H7B 110.3 . . ? 
H7A C7 H7B 108.6 . . ? 
O1 C8 H8A 109.5 . . ? 
O1 C8 H8B 109.5 . . ? 
H8A C8 H8B 109.5 . . ? 
O1 C8 H8C 109.5 . . ? 
H8A C8 H8C 109.5 . . ? 
H8B C8 H8C 109.5 . . ? 
O2 C9 C6 106.6(2) . . ? 
O2 C9 H9A 110.4 . . ? 
C6 C9 H9A 110.4 . . ? 
O2 C9 H9B 110.4 . . ? 
C6 C9 H9B 110.4 . . ? 
H9A C9 H9B 108.6 . . ? 
O2 C10 H10A 109.5 . . ? 
O2 C10 H10B 109.5 . . ? 
H10A C10 H10B 109.5 . . ? 
O2 C10 H10C 109.5 . . ? 
H10A C10 H10C 109.5 . . ? 
H10B C10 H10C 109.5 . . ? 
 
_diffrn_measured_fraction_theta_max    1.000 
_diffrn_reflns_theta_full              27.48 
_diffrn_measured_fraction_theta_full   1.000 
_refine_diff_density_max    1.633 
_refine_diff_density_min   -1.041 
_refine_diff_density_rms    0.113 
#===END


 
data_2-ocotsbcl2-ruzic 
 
_audit_creation_method            SHELXL-97 
_chemical_name_systematic 
; 
 ? 
; 
_chemical_name_common             ? 
_chemical_melting_point           ? 
_chemical_formula_moiety          'C16 H25 Cl2 O2 Sb' 
_chemical_formula_sum 
 'C16 H25 Cl2 O2 Sb' 
_chemical_formula_weight          442.01 
_chemical_compound_source         'synthesized by the authors'
 
loop_ 
 _atom_type_symbol 
 _atom_type_description 
 _atom_type_scat_dispersion_real 
 _atom_type_scat_dispersion_imag 
 _atom_type_scat_source 
 'C'  'C'   0.0033   0.0016 
 'International Tables Vol C Tables 4.2.6.8 and 6.1.1.4' 
 'H'  'H'   0.0000   0.0000 
 'International Tables Vol C Tables 4.2.6.8 and 6.1.1.4' 
 'Cl'  'Cl'   0.1484   0.1585 
 'International Tables Vol C Tables 4.2.6.8 and 6.1.1.4' 
 'Sb'  'Sb'  -0.5866   1.5461 
 'International Tables Vol C Tables 4.2.6.8 and 6.1.1.4' 
 'O'  'O'   0.0106   0.0060 
 'International Tables Vol C Tables 4.2.6.8 and 6.1.1.4' 
 
_symmetry_cell_setting            monoclinic 
_symmetry_space_group_name_H-M    'P 21/n'
_symmetry_space_group_name_Hall   '-P 2yn' 
 
loop_ 
 _symmetry_equiv_pos_as_xyz 
 'x, y, z' 
 '-x+1/2, y+1/2, -z+1/2' 
 '-x, -y, -z' 
 'x-1/2, -y-1/2, z-1/2' 
 
_cell_length_a                    10.6320(2) 
_cell_length_b                    12.3460(2) 
_cell_length_c                    14.8750(3) 
_cell_angle_alpha                 90.00 
_cell_angle_beta                  102.1500(11) 
_cell_angle_gamma                 90.00 
_cell_volume                      1908.80(6) 
_cell_formula_units_Z             4 
_cell_measurement_temperature     200(2) 
_cell_measurement_reflns_used     20564 
_cell_measurement_theta_min       1 
_cell_measurement_theta_max       27.5 
 
_exptl_crystal_description        plate 
_exptl_crystal_colour             colourless 
_exptl_crystal_size_max           0.37 
_exptl_crystal_size_mid           0.27 
_exptl_crystal_size_min           0.25 
_exptl_crystal_density_meas       ? 
_exptl_crystal_density_diffrn     1.538 
_exptl_crystal_density_method     'not measured' 
_exptl_crystal_F_000              888 
_exptl_absorpt_coefficient_mu     1.727 
_exptl_absorpt_correction_type    multiscans 
_exptl_absorpt_correction_T_min   0.592 
_exptl_absorpt_correction_T_max   0.635 
_exptl_absorpt_process_details    '(SORTAV; Blessing 1997)' 
 
_exptl_special_details 
; 
 ? 
; 
 
_diffrn_ambient_temperature       200(2) 
_diffrn_radiation_wavelength      0.71073 
_diffrn_radiation_type            MoK\a 
_diffrn_radiation_source          'fine-focus sealed tube' 
_diffrn_radiation_monochromator   graphite 
_diffrn_measurement_device_type   'Nonius KappaCCD area detector' 
_diffrn_measurement_method        '\f and \w scans to fill the Ewald sphere' 
_diffrn_detector_area_resol_mean  9.091 
_diffrn_standards_number          0 
_diffrn_standards_interval_count  ? 
_diffrn_standards_interval_time   ? 
_diffrn_standards_decay_%         ? 
_diffrn_reflns_number             29013 
_diffrn_reflns_av_R_equivalents   0.0308 
_diffrn_reflns_av_sigmaI/netI     0.0177 
_diffrn_reflns_limit_h_min        -13 
_diffrn_reflns_limit_h_max        13 
_diffrn_reflns_limit_k_min        -16 
_diffrn_reflns_limit_k_max        16 
_diffrn_reflns_limit_l_min        -19 
_diffrn_reflns_limit_l_max        19 
_diffrn_reflns_theta_min          2.16 
_diffrn_reflns_theta_max          27.53 
_reflns_number_total              4374 
_reflns_number_gt                 3950 
_reflns_threshold_expression      I>2\s(I) 
 
_computing_data_collection         
 'COLLECT (Hooft, 1998) and DENZO (Otwinowski & Minor, 1997)'
_computing_cell_refinement        'COLLECT and DENZO' 
_computing_data_reduction         'COLLECT and DENZO' 
_computing_structure_solution     'SHELXS-97 (Sheldrick, 1990)' 
_computing_structure_refinement   'SIR92 (Altomare et al., 1994)' 
_computing_molecular_graphics     ? 
_computing_publication_material   ? 
 
_refine_special_details 
; 
 Refinement of F^2^ against ALL reflections.  The weighted R-factor wR and 
 goodness of fit S are based on F^2^, conventional R-factors R are based 
 on F, with F set to zero for negative F^2^. The threshold expression of 
 F^2^ > 2sigma(F^2^) is used only for calculating R-factors(gt) etc. and is 
 not relevant to the choice of reflections for refinement.  R-factors based 
 on F^2^ are statistically about twice as large as those based on F, and R- 
 factors based on ALL data will be even larger. 
; 
 
_refine_ls_structure_factor_coef  Fsqd  
_refine_ls_matrix_type            full 
_refine_ls_weighting_scheme       calc  
_refine_ls_weighting_details 
 'calc w=1/[\s^2^(Fo^2^)+(0.0213P)^2^+1.3235P] where P=(Fo^2^+2Fc^2^)/3' 
_atom_sites_solution_primary      direct 
_atom_sites_solution_secondary    difmap 
_atom_sites_solution_hydrogens    difmap 
_refine_ls_hydrogen_treatment     constr 
_refine_ls_extinction_method      SHELXL 
_refine_ls_extinction_coef        0.0036(3) 
_refine_ls_extinction_expression 
 'Fc^*^=kFc[1+0.001xFc^2^\l^3^/sin(2\q)]^-1/4^' 
_refine_ls_number_reflns          4374 
_refine_ls_number_parameters      197 
_refine_ls_number_restraints      0 
_refine_ls_R_factor_all           0.0266 
_refine_ls_R_factor_gt            0.0226 
_refine_ls_wR_factor_ref          0.0551 
_refine_ls_wR_factor_gt           0.0531 
_refine_ls_goodness_of_fit_ref    1.057 
_refine_ls_restrained_S_all       1.057 
_refine_ls_shift/su_max           0.004 
_refine_ls_shift/su_mean          0.000 
 
loop_ 
 _atom_site_label 
 _atom_site_type_symbol 
 _atom_site_fract_x 
 _atom_site_fract_y 
 _atom_site_fract_z 
 _atom_site_U_iso_or_equiv 
 _atom_site_adp_type 
 _atom_site_occupancy 
 _atom_site_symmetry_multiplicity 
 _atom_site_calc_flag 
 _atom_site_refinement_flags 
 _atom_site_disorder_assembly 
 _atom_site_disorder_group 
Sb1 Sb 1.014359(13) 0.053123(10) 0.847446(9) 0.03553(6) Uani 1 1 d . . . 
Cl1 Cl 0.80306(6) 0.00460(5) 0.87311(5) 0.05629(16) Uani 1 1 d . . . 
Cl2 Cl 1.02244(6) -0.13435(4) 0.80121(5) 0.05258(15) Uani 1 1 d . . . 
O1 O 0.89256(12) 0.24454(11) 0.84486(9) 0.0352(3) Uani 1 1 d . . . 
O2 O 1.20510(13) 0.04389(11) 0.76028(10) 0.0360(3) Uani 1 1 d . . . 
C1 C 0.95556(17) 0.11579(14) 0.71095(13) 0.0309(4) Uani 1 1 d . . . 
C2 C 0.85408(18) 0.19037(15) 0.68972(14) 0.0342(4) Uani 1 1 d . . . 
C3 C 0.8149(2) 0.22747(17) 0.60025(15) 0.0439(5) Uani 1 1 d . . . 
H3 H 0.7469 0.2762 0.5859 0.053 Uiso 1 1 calc R . . 
C4 C 0.8759(2) 0.19270(18) 0.53237(16) 0.0478(5) Uani 1 1 d . . . 
H4 H 0.8455 0.2143 0.4718 0.057 Uiso 1 1 calc R . . 
C5 C 0.9823(2) 0.12584(17) 0.55415(15) 0.0428(5) Uani 1 1 d . . . 
H5 H 1.0261 0.1058 0.5088 0.051 Uiso 1 1 calc R . . 
C6 C 1.02390(19) 0.08837(16) 0.64372(14) 0.0343(4) Uani 1 1 d . . . 
C7 C 0.79353(18) 0.23703(17) 0.76359(15) 0.0389(4) Uani 1 1 d . . . 
H7A H 0.7582 0.3081 0.7457 0.047 Uiso 1 1 calc R . . 
H7B H 0.7246 0.1905 0.7742 0.047 Uiso 1 1 calc R . . 
C8 C 0.8652(2) 0.30985(18) 0.92087(16) 0.0437(5) Uani 1 1 d . . . 
C9 C 0.9896(3) 0.3038(2) 0.99162(18) 0.0621(7) Uani 1 1 d . . . 
H9A H 1.0069 0.2299 1.0101 0.093 Uiso 1 1 calc R . . 
H9B H 0.9826 0.3466 1.0442 0.093 Uiso 1 1 calc R . . 
H9C H 1.0586 0.3311 0.9656 0.093 Uiso 1 1 calc R . . 
C10 C 0.7549(3) 0.2620(3) 0.9575(2) 0.0820(10) Uani 1 1 d . . . 
H10A H 0.6770 0.2671 0.9113 0.123 Uiso 1 1 calc R . . 
H10B H 0.7449 0.3012 1.0113 0.123 Uiso 1 1 calc R . . 
H10C H 0.7727 0.1873 0.9731 0.123 Uiso 1 1 calc R . . 
C11 C 0.8371(3) 0.4254(2) 0.8898(2) 0.0703(8) Uani 1 1 d . . . 
H11A H 0.9040 0.4512 0.8609 0.106 Uiso 1 1 calc R . . 
H11B H 0.8332 0.4700 0.9420 0.106 Uiso 1 1 calc R . . 
H11C H 0.7561 0.4284 0.8466 0.106 Uiso 1 1 calc R . . 
C12 C 1.1460(2) 0.02289(18) 0.66666(14) 0.0405(5) Uani 1 1 d . . . 
H12A H 1.1267 -0.0537 0.6580 0.049 Uiso 1 1 calc R . . 
H12B H 1.2034 0.0434 0.6268 0.049 Uiso 1 1 calc R . . 
C13 C 1.3378(2) 0.00512(19) 0.79104(17) 0.0445(5) Uani 1 1 d . . . 
C14 C 1.4258(3) 0.0815(3) 0.7553(3) 0.0845(11) Uani 1 1 d . . . 
H14A H 1.4067 0.0798 0.6893 0.127 Uiso 1 1 calc R . . 
H14B H 1.5135 0.0600 0.7779 0.127 Uiso 1 1 calc R . . 
H14C H 1.4135 0.1537 0.7759 0.127 Uiso 1 1 calc R . . 
C15 C 1.3604(3) 0.0084(3) 0.8949(2) 0.0791(9) Uani 1 1 d . . . 
H15A H 1.3470 0.0808 0.9145 0.119 Uiso 1 1 calc R . . 
H15B H 1.4471 -0.0136 0.9207 0.119 Uiso 1 1 calc R . . 
H15C H 1.3015 -0.0399 0.9154 0.119 Uiso 1 1 calc R . . 
C16 C 1.3534(3) -0.1105(2) 0.7610(2) 0.0672(8) Uani 1 1 d . . . 
H16A H 1.2918 -0.1560 0.7815 0.101 Uiso 1 1 calc R . . 
H16B H 1.4387 -0.1353 0.7873 0.101 Uiso 1 1 calc R . . 
H16C H 1.3394 -0.1134 0.6951 0.101 Uiso 1 1 calc R . . 
 
loop_ 
 _atom_site_aniso_label 
 _atom_site_aniso_U_11 
 _atom_site_aniso_U_22 
 _atom_site_aniso_U_33 
 _atom_site_aniso_U_23 
 _atom_site_aniso_U_13 
 _atom_site_aniso_U_12 
Sb1 0.03768(9) 0.03171(9) 0.03598(9) 0.00240(5) 0.00498(6) -0.00150(5) 
Cl1 0.0583(3) 0.0411(3) 0.0794(4) 0.0007(3) 0.0369(3) -0.0080(2) 
Cl2 0.0492(3) 0.0281(2) 0.0819(4) 0.0036(2) 0.0172(3) 0.0010(2) 
O1 0.0308(7) 0.0335(7) 0.0406(7) -0.0070(6) 0.0058(6) 0.0018(5) 
O2 0.0303(7) 0.0372(7) 0.0390(8) -0.0012(6) 0.0035(6) 0.0050(5) 
C1 0.0297(9) 0.0259(8) 0.0348(10) -0.0013(7) 0.0015(7) -0.0029(7) 
C2 0.0284(9) 0.0265(9) 0.0446(11) -0.0045(8) 0.0005(8) -0.0016(7) 
C3 0.0430(11) 0.0329(10) 0.0481(12) -0.0029(9) -0.0081(9) 0.0083(8) 
C4 0.0567(14) 0.0415(12) 0.0379(11) 0.0013(9) -0.0068(10) 0.0048(10) 
C5 0.0486(12) 0.0419(11) 0.0357(11) -0.0025(9) 0.0041(9) -0.0008(9) 
C6 0.0353(10) 0.0284(9) 0.0375(10) -0.0009(8) 0.0039(8) 0.0003(7) 
C7 0.0274(9) 0.0368(10) 0.0499(12) -0.0055(9) 0.0020(8) 0.0040(8) 
C8 0.0415(11) 0.0410(11) 0.0508(12) -0.0140(10) 0.0147(10) 0.0007(9) 
C9 0.0631(16) 0.0738(18) 0.0472(14) -0.0187(13) 0.0069(12) 0.0024(14) 
C10 0.078(2) 0.085(2) 0.101(2) -0.0388(19) 0.0584(19) -0.0207(17) 
C11 0.095(2) 0.0430(14) 0.0699(19) -0.0177(13) 0.0104(17) 0.0137(14) 
C12 0.0410(11) 0.0436(11) 0.0366(11) -0.0013(9) 0.0073(9) 0.0091(9) 
C13 0.0303(10) 0.0458(12) 0.0548(13) 0.0034(10) 0.0032(9) 0.0082(9) 
C14 0.0367(13) 0.081(2) 0.137(3) 0.032(2) 0.0195(17) -0.0019(13) 
C15 0.0522(16) 0.114(3) 0.0610(18) -0.0085(18) -0.0111(13) 0.0210(17) 
C16 0.0499(14) 0.0503(15) 0.098(2) -0.0030(14) 0.0074(14) 0.0200(12) 
 
_geom_special_details 
; 
 All esds (except the esd in the dihedral angle between two l.s. planes) 
 are estimated using the full covariance matrix.  The cell esds are taken 
 into account individually in the estimation of esds in distances, angles 
 and torsion angles; correlations between esds in cell parameters are only 
 used when they are defined by crystal symmetry.  An approximate (isotropic) 
 treatment of cell esds is used for estimating esds involving l.s. planes. 
; 
 
loop_ 
 _geom_bond_atom_site_label_1 
 _geom_bond_atom_site_label_2 
 _geom_bond_distance 
 _geom_bond_site_symmetry_2 
 _geom_bond_publ_flag 
Sb1 C1 2.1395(19) . ? 
Sb1 Cl2 2.4212(6) . ? 
Sb1 Cl1 2.4316(6) . ? 
O1 C7 1.429(2) . ? 
O1 C8 1.467(2) . ? 
O2 C12 1.426(3) . ? 
O2 C13 1.469(2) . ? 
C1 C6 1.396(3) . ? 
C1 C2 1.403(3) . ? 
C2 C3 1.386(3) . ? 
C2 C7 1.500(3) . ? 
C3 C4 1.379(3) . ? 
C3 H3 0.9300 . ? 
C4 C5 1.382(3) . ? 
C4 H4 0.9300 . ? 
C5 C6 1.392(3) . ? 
C5 H5 0.9300 . ? 
C6 C12 1.506(3) . ? 
C7 H7A 0.9700 . ? 
C7 H7B 0.9700 . ? 
C8 C9 1.509(3) . ? 
C8 C11 1.510(4) . ? 
C8 C10 1.513(3) . ? 
C9 H9A 0.9600 . ? 
C9 H9B 0.9600 . ? 
C9 H9C 0.9600 . ? 
C10 H10A 0.9600 . ? 
C10 H10B 0.9600 . ? 
C10 H10C 0.9600 . ? 
C11 H11A 0.9600 . ? 
C11 H11B 0.9600 . ? 
C11 H11C 0.9600 . ? 
C12 H12A 0.9700 . ? 
C12 H12B 0.9700 . ? 
C13 C14 1.503(4) . ? 
C13 C15 1.513(4) . ? 
C13 C16 1.515(3) . ? 
C14 H14A 0.9600 . ? 
C14 H14B 0.9600 . ? 
C14 H14C 0.9600 . ? 
C15 H15A 0.9600 . ? 
C15 H15B 0.9600 . ? 
C15 H15C 0.9600 . ? 
C16 H16A 0.9600 . ? 
C16 H16B 0.9600 . ? 
C16 H16C 0.9600 . ? 
 
loop_ 
 _geom_angle_atom_site_label_1 
 _geom_angle_atom_site_label_2 
 _geom_angle_atom_site_label_3 
 _geom_angle 
 _geom_angle_site_symmetry_1 
 _geom_angle_site_symmetry_3 
 _geom_angle_publ_flag 
C1 Sb1 Cl2 95.56(5) . . ? 
C1 Sb1 Cl1 98.22(5) . . ? 
Cl2 Sb1 Cl1 84.16(2) . . ? 
C7 O1 C8 117.21(15) . . ? 
C12 O2 C13 116.23(16) . . ? 
C6 C1 C2 119.31(18) . . ? 
C6 C1 Sb1 120.00(13) . . ? 
C2 C1 Sb1 120.54(14) . . ? 
C3 C2 C1 119.63(19) . . ? 
C3 C2 C7 119.19(18) . . ? 
C1 C2 C7 121.02(18) . . ? 
C4 C3 C2 120.51(19) . . ? 
C4 C3 H3 119.7 . . ? 
C2 C3 H3 119.7 . . ? 
C3 C4 C5 120.1(2) . . ? 
C3 C4 H4 119.9 . . ? 
C5 C4 H4 119.9 . . ? 
C4 C5 C6 120.2(2) . . ? 
C4 C5 H5 119.9 . . ? 
C6 C5 H5 119.9 . . ? 
C5 C6 C1 119.79(19) . . ? 
C5 C6 C12 118.72(19) . . ? 
C1 C6 C12 121.43(18) . . ? 
O1 C7 C2 106.92(15) . . ? 
O1 C7 H7A 110.3 . . ? 
C2 C7 H7A 110.3 . . ? 
O1 C7 H7B 110.3 . . ? 
C2 C7 H7B 110.3 . . ? 
H7A C7 H7B 108.6 . . ? 
O1 C8 C9 102.90(17) . . ? 
O1 C8 C11 110.0(2) . . ? 
C9 C8 C11 110.4(2) . . ? 
O1 C8 C10 110.94(19) . . ? 
C9 C8 C10 111.2(2) . . ? 
C11 C8 C10 111.2(2) . . ? 
C8 C9 H9A 109.5 . . ? 
C8 C9 H9B 109.5 . . ? 
H9A C9 H9B 109.5 . . ? 
C8 C9 H9C 109.5 . . ? 
H9A C9 H9C 109.5 . . ? 
H9B C9 H9C 109.5 . . ? 
C8 C10 H10A 109.5 . . ? 
C8 C10 H10B 109.5 . . ? 
H10A C10 H10B 109.5 . . ? 
C8 C10 H10C 109.5 . . ? 
H10A C10 H10C 109.5 . . ? 
H10B C10 H10C 109.5 . . ? 
C8 C11 H11A 109.5 . . ? 
C8 C11 H11B 109.5 . . ? 
H11A C11 H11B 109.5 . . ? 
C8 C11 H11C 109.5 . . ? 
H11A C11 H11C 109.5 . . ? 
H11B C11 H11C 109.5 . . ? 
O2 C12 C6 107.79(16) . . ? 
O2 C12 H12A 110.1 . . ? 
C6 C12 H12A 110.1 . . ? 
O2 C12 H12B 110.1 . . ? 
C6 C12 H12B 110.1 . . ? 
H12A C12 H12B 108.5 . . ? 
O2 C13 C14 108.31(19) . . ? 
O2 C13 C15 104.19(19) . . ? 
C14 C13 C15 111.6(3) . . ? 
O2 C13 C16 111.87(18) . . ? 
C14 C13 C16 111.9(2) . . ? 
C15 C13 C16 108.8(2) . . ? 
C13 C14 H14A 109.5 . . ? 
C13 C14 H14B 109.5 . . ? 
H14A C14 H14B 109.5 . . ? 
C13 C14 H14C 109.5 . . ? 
H14A C14 H14C 109.5 . . ? 
H14B C14 H14C 109.5 . . ? 
C13 C15 H15A 109.5 . . ? 
C13 C15 H15B 109.5 . . ? 
H15A C15 H15B 109.5 . . ? 
C13 C15 H15C 109.5 . . ? 
H15A C15 H15C 109.5 . . ? 
H15B C15 H15C 109.5 . . ? 
C13 C16 H16A 109.5 . . ? 
C13 C16 H16B 109.5 . . ? 
H16A C16 H16B 109.5 . . ? 
C13 C16 H16C 109.5 . . ? 
H16A C16 H16C 109.5 . . ? 
H16B C16 H16C 109.5 . . ? 
 
_diffrn_measured_fraction_theta_max    0.995 
_diffrn_reflns_theta_full              27.53 
_diffrn_measured_fraction_theta_full   0.995 
_refine_diff_density_max    0.596 
_refine_diff_density_min   -0.625 
_refine_diff_density_rms    0.055 
#===END


 
data_3-sbocomi2-ruzic 
 
_audit_creation_method            SHELXL-97 
_chemical_name_systematic 
; 
 ? 
; 
_chemical_name_common             ? 
_chemical_melting_point           ? 
_chemical_formula_moiety          'C10 H13 I2 O2 Sb' 
_chemical_formula_sum 
 'C10 H13 I2 O2 Sb' 
_chemical_formula_weight          540.75 
_chemical_compound_source         'synthesized by the authors'
 
loop_ 
 _atom_type_symbol 
 _atom_type_description 
 _atom_type_scat_dispersion_real 
 _atom_type_scat_dispersion_imag 
 _atom_type_scat_source 
 'C'  'C'   0.0033   0.0016 
 'International Tables Vol C Tables 4.2.6.8 and 6.1.1.4' 
 'H'  'H'   0.0000   0.0000 
 'International Tables Vol C Tables 4.2.6.8 and 6.1.1.4' 
 'O'  'O'   0.0106   0.0060 
 'International Tables Vol C Tables 4.2.6.8 and 6.1.1.4' 
 'I'  'I'  -0.4742   1.8119 
 'International Tables Vol C Tables 4.2.6.8 and 6.1.1.4' 
 'Sb'  'Sb'  -0.5866   1.5461 
 'International Tables Vol C Tables 4.2.6.8 and 6.1.1.4' 
 
_symmetry_cell_setting            orthorhombic 
_symmetry_space_group_name_H-M    'P b c a' 
_symmetry_space_group_name_Hall   '-P 2ac 2ab'
 
loop_ 
 _symmetry_equiv_pos_as_xyz 
 'x, y, z' 
 '-x+1/2, -y, z+1/2' 
 'x+1/2, -y+1/2, -z' 
 '-x, y+1/2, -z+1/2' 
 '-x, -y, -z' 
 'x-1/2, y, -z-1/2' 
 '-x-1/2, y-1/2, z' 
 'x, -y-1/2, z-1/2' 
 
_cell_length_a                    14.02800(10) 
_cell_length_b                    8.0980(2) 
_cell_length_c                    25.4260(3) 
_cell_angle_alpha                 90.00 
_cell_angle_beta                  90.00 
_cell_angle_gamma                 90.00 
_cell_volume                      2888.36(8) 
_cell_formula_units_Z             8 
_cell_measurement_temperature     150(2) 
_cell_measurement_reflns_used     38281 
_cell_measurement_theta_min       1 
_cell_measurement_theta_max       27.5 
 
_exptl_crystal_description        prism 
_exptl_crystal_colour             yellow 
_exptl_crystal_size_max           0.5 
_exptl_crystal_size_mid           0.18 
_exptl_crystal_size_min           0.1 
_exptl_crystal_density_meas       ? 
_exptl_crystal_density_diffrn     2.487 
_exptl_crystal_density_method     'not measured' 
_exptl_crystal_F_000              1968 
_exptl_absorpt_coefficient_mu     6.168 
_exptl_absorpt_correction_type    gaussian 
_exptl_absorpt_correction_T_min   0.257 
_exptl_absorpt_correction_T_max   0.544 
_exptl_absorpt_process_details    '(Coppens, 1970)' 
 
_exptl_special_details 
; 
 Coppens, P. (1970). Acta Cryst. A26, 71-83. 
; 
 
_diffrn_ambient_temperature       150(2) 
_diffrn_radiation_wavelength      0.71073 
_diffrn_radiation_type            MoK\a 
_diffrn_radiation_source          'fine-focus sealed tube' 
_diffrn_radiation_monochromator   graphite 
_diffrn_measurement_device_type   'Nonius KappaCCD area detector' 
_diffrn_measurement_method        '\f and \w scans to fill the Ewald sphere' 
_diffrn_detector_area_resol_mean  9.091 
_diffrn_standards_number          0 
_diffrn_standards_interval_count  ? 
_diffrn_standards_interval_time   ? 
_diffrn_standards_decay_%         ? 
_diffrn_reflns_number             40774 
_diffrn_reflns_av_R_equivalents   0.0378 
_diffrn_reflns_av_sigmaI/netI     0.0156 
_diffrn_reflns_limit_h_min        -18 
_diffrn_reflns_limit_h_max        18 
_diffrn_reflns_limit_k_min        -10 
_diffrn_reflns_limit_k_max        10 
_diffrn_reflns_limit_l_min        -32 
_diffrn_reflns_limit_l_max        32 
_diffrn_reflns_theta_min          1.60 
_diffrn_reflns_theta_max          27.51 
_reflns_number_total              3312 
_reflns_number_gt                 3068 
_reflns_threshold_expression      I>2\s(I) 
 
_computing_data_collection         
 'COLLECT (Hooft, 1998) and DENZO (Otwinowski & Minor, 1997)'
_computing_cell_refinement        'COLLECT and DENZO' 
_computing_data_reduction         'COLLECT and DENZO' 
_computing_structure_solution     'SIR92 (Altomare et al., 1994)' 
_computing_structure_refinement   'SHELXL-97 (Sheldrick, 1997)' 
_computing_molecular_graphics     ? 
_computing_publication_material   ? 
 
_refine_special_details 
; 
 Refinement of F^2^ against ALL reflections.  The weighted R-factor wR and 
 goodness of fit S are based on F^2^, conventional R-factors R are based 
 on F, with F set to zero for negative F^2^. The threshold expression of 
 F^2^ > 2sigma(F^2^) is used only for calculating R-factors(gt) etc. and is 
 not relevant to the choice of reflections for refinement.  R-factors based 
 on F^2^ are statistically about twice as large as those based on F, and R- 
 factors based on ALL data will be even larger. 
; 
 
_refine_ls_structure_factor_coef  Fsqd  
_refine_ls_matrix_type            full 
_refine_ls_weighting_scheme       calc  
_refine_ls_weighting_details 
 'calc w=1/[\s^2^(Fo^2^)+(0.0192P)^2^+5.5192P] where P=(Fo^2^+2Fc^2^)/3' 
_atom_sites_solution_primary      direct 
_atom_sites_solution_secondary    difmap 
_atom_sites_solution_hydrogens    geom 
_refine_ls_hydrogen_treatment     constr 
_refine_ls_extinction_method      SHELXL 
_refine_ls_extinction_coef        0.00073(6) 
_refine_ls_extinction_expression 
 'Fc^*^=kFc[1+0.001xFc^2^\l^3^/sin(2\q)]^-1/4^' 
_refine_ls_number_reflns          3312 
_refine_ls_number_parameters      139 
_refine_ls_number_restraints      0 
_refine_ls_R_factor_all           0.0239 
_refine_ls_R_factor_gt            0.0206 
_refine_ls_wR_factor_ref          0.0496 
_refine_ls_wR_factor_gt           0.0477 
_refine_ls_goodness_of_fit_ref    1.136 
_refine_ls_restrained_S_all       1.136 
_refine_ls_shift/su_max           0.003 
_refine_ls_shift/su_mean          0.000 
 
loop_ 
 _atom_site_label 
 _atom_site_type_symbol 
 _atom_site_fract_x 
 _atom_site_fract_y 
 _atom_site_fract_z 
 _atom_site_U_iso_or_equiv 
 _atom_site_adp_type 
 _atom_site_occupancy 
 _atom_site_symmetry_multiplicity 
 _atom_site_calc_flag 
 _atom_site_refinement_flags 
 _atom_site_disorder_assembly 
 _atom_site_disorder_group 
Sb1 Sb 0.978217(14) 0.23266(2) 0.156156(7) 0.02086(7) Uani 1 1 d . . . 
O1 O 1.11281(16) 0.0869(3) 0.13460(9) 0.0273(5) Uani 1 1 d . . . 
O2 O 0.88608(15) 0.4610(3) 0.14344(9) 0.0262(5) Uani 1 1 d . . . 
C1 C 1.0463(2) 0.3695(4) 0.09646(10) 0.0216(6) Uani 1 1 d . . . 
C2 C 1.1223(2) 0.2988(4) 0.06954(11) 0.0247(6) Uani 1 1 d . . . 
C3 C 1.1653(2) 0.3875(4) 0.02898(12) 0.0290(7) Uani 1 1 d . . . 
H3 H 1.2158 0.3420 0.0103 0.035 Uiso 1 1 calc R . . 
C4 C 1.1320(2) 0.5445(4) 0.01669(13) 0.0300(7) Uani 1 1 d . . . 
H4 H 1.1609 0.6033 -0.0104 0.036 Uiso 1 1 calc R . . 
C5 C 1.0568(2) 0.6152(4) 0.04373(12) 0.0275(6) Uani 1 1 d . . . 
H5 H 1.0358 0.7207 0.0350 0.033 Uiso 1 1 calc R . . 
C6 C 1.0126(2) 0.5267(4) 0.08437(12) 0.0230(6) Uani 1 1 d . . . 
C7 C 1.1548(2) 0.1295(4) 0.08467(12) 0.0287(7) Uani 1 1 d . . . 
H7A H 1.1355 0.0504 0.0581 0.034 Uiso 1 1 calc R . . 
H7B H 1.2238 0.1271 0.0873 0.034 Uiso 1 1 calc R . . 
C8 C 1.1370(3) -0.0758(4) 0.15290(14) 0.0357(8) Uani 1 1 d . . . 
H8A H 1.1189 -0.1558 0.1269 0.054 Uiso 1 1 calc R . . 
H8B H 1.1038 -0.0980 0.1851 0.054 Uiso 1 1 calc R . . 
H8C H 1.2045 -0.0821 0.1589 0.054 Uiso 1 1 calc R . . 
C9 C 0.9304(2) 0.5953(4) 0.11524(12) 0.0276(6) Uani 1 1 d . . . 
H9A H 0.9529 0.6784 0.1398 0.033 Uiso 1 1 calc R . . 
H9B H 0.8847 0.6464 0.0917 0.033 Uiso 1 1 calc R . . 
C10 C 0.8190(2) 0.5143(5) 0.18295(14) 0.0359(8) Uani 1 1 d . . . 
H10A H 0.8511 0.5828 0.2082 0.054 Uiso 1 1 calc R . . 
H10B H 0.7927 0.4195 0.2004 0.054 Uiso 1 1 calc R . . 
H10C H 0.7687 0.5760 0.1666 0.054 Uiso 1 1 calc R . . 
I1 I 0.881006(16) 0.04113(3) 0.070873(8) 0.02979(7) Uani 1 1 d . . . 
I2 I 1.090375(17) 0.43178(3) 0.232761(9) 0.03603(8) Uani 1 1 d . . . 
 
loop_ 
 _atom_site_aniso_label 
 _atom_site_aniso_U_11 
 _atom_site_aniso_U_22 
 _atom_site_aniso_U_33 
 _atom_site_aniso_U_23 
 _atom_site_aniso_U_13 
 _atom_site_aniso_U_12 
Sb1 0.02305(11) 0.02226(11) 0.01727(11) 0.00071(7) 0.00166(7) 0.00028(7) 
O1 0.0319(12) 0.0265(11) 0.0235(11) 0.0022(9) 0.0026(9) 0.0072(9) 
O2 0.0234(11) 0.0264(11) 0.0287(11) -0.0006(9) 0.0034(9) 0.0020(8) 
C1 0.0232(14) 0.0253(14) 0.0163(13) -0.0014(11) -0.0002(11) -0.0067(11) 
C2 0.0236(14) 0.0293(15) 0.0210(14) -0.0039(12) -0.0006(11) -0.0057(12) 
C3 0.0237(15) 0.0399(18) 0.0233(14) -0.0042(13) 0.0038(12) -0.0080(13) 
C4 0.0299(16) 0.0349(17) 0.0253(15) 0.0041(13) -0.0019(13) -0.0152(13) 
C5 0.0315(16) 0.0281(15) 0.0230(15) 0.0035(12) -0.0075(12) -0.0097(13) 
C6 0.0244(14) 0.0237(14) 0.0210(13) -0.0010(11) -0.0037(11) -0.0059(11) 
C7 0.0256(15) 0.0331(17) 0.0272(15) -0.0039(13) 0.0067(12) 0.0006(13) 
C8 0.0392(19) 0.0309(17) 0.0371(18) 0.0020(14) -0.0041(15) 0.0075(15) 
C9 0.0351(17) 0.0221(14) 0.0257(15) 0.0019(12) -0.0002(13) 0.0013(13) 
C10 0.0300(17) 0.0427(19) 0.0349(18) -0.0025(15) 0.0083(14) 0.0094(15) 
I1 0.03507(13) 0.02548(11) 0.02883(12) 0.00130(8) -0.00685(8) -0.00440(8) 
I2 0.03541(13) 0.04556(14) 0.02712(12) -0.01157(9) -0.00678(9) 0.00255(10) 
 
_geom_special_details 
; 
 All esds (except the esd in the dihedral angle between two l.s. planes) 
 are estimated using the full covariance matrix.  The cell esds are taken 
 into account individually in the estimation of esds in distances, angles 
 and torsion angles; correlations between esds in cell parameters are only 
 used when they are defined by crystal symmetry.  An approximate (isotropic) 
 treatment of cell esds is used for estimating esds involving l.s. planes. 
; 
 
loop_ 
 _geom_bond_atom_site_label_1 
 _geom_bond_atom_site_label_2 
 _geom_bond_distance 
 _geom_bond_site_symmetry_2 
 _geom_bond_publ_flag 
Sb1 C1 2.108(3) . ? 
Sb1 O2 2.279(2) . ? 
Sb1 O1 2.293(2) . ? 
Sb1 I2 2.9782(3) . ? 
Sb1 I1 2.9945(3) . ? 
O1 C8 1.438(4) . ? 
O1 C7 1.442(4) . ? 
O2 C10 1.442(4) . ? 
O2 C9 1.444(4) . ? 
C1 C2 1.390(4) . ? 
C1 C6 1.393(4) . ? 
C2 C3 1.394(4) . ? 
C2 C7 1.495(5) . ? 
C3 C4 1.390(5) . ? 
C3 H3 0.9300 . ? 
C4 C5 1.383(5) . ? 
C4 H4 0.9300 . ? 
C5 C6 1.402(4) . ? 
C5 H5 0.9300 . ? 
C6 C9 1.501(4) . ? 
C7 H7A 0.9700 . ? 
C7 H7B 0.9700 . ? 
C8 H8A 0.9600 . ? 
C8 H8B 0.9600 . ? 
C8 H8C 0.9600 . ? 
C9 H9A 0.9700 . ? 
C9 H9B 0.9700 . ? 
C10 H10A 0.9600 . ? 
C10 H10B 0.9600 . ? 
C10 H10C 0.9600 . ? 
 
loop_ 
 _geom_angle_atom_site_label_1 
 _geom_angle_atom_site_label_2 
 _geom_angle_atom_site_label_3 
 _geom_angle 
 _geom_angle_site_symmetry_1 
 _geom_angle_site_symmetry_3 
 _geom_angle_publ_flag 
C1 Sb1 O2 74.24(10) . . ? 
C1 Sb1 O1 74.06(10) . . ? 
O2 Sb1 O1 148.28(8) . . ? 
C1 Sb1 I2 86.95(8) . . ? 
O2 Sb1 I2 87.31(6) . . ? 
O1 Sb1 I2 90.00(6) . . ? 
C1 Sb1 I1 87.55(7) . . ? 
O2 Sb1 I1 93.40(6) . . ? 
O1 Sb1 I1 86.29(6) . . ? 
I2 Sb1 I1 174.047(9) . . ? 
C8 O1 C7 114.0(2) . . ? 
C8 O1 Sb1 126.1(2) . . ? 
C7 O1 Sb1 115.09(18) . . ? 
C10 O2 C9 113.7(2) . . ? 
C10 O2 Sb1 120.92(19) . . ? 
C9 O2 Sb1 115.95(17) . . ? 
C2 C1 C6 121.9(3) . . ? 
C2 C1 Sb1 119.0(2) . . ? 
C6 C1 Sb1 119.1(2) . . ? 
C1 C2 C3 118.9(3) . . ? 
C1 C2 C7 119.0(3) . . ? 
C3 C2 C7 122.1(3) . . ? 
C4 C3 C2 119.5(3) . . ? 
C4 C3 H3 120.3 . . ? 
C2 C3 H3 120.3 . . ? 
C5 C4 C3 121.6(3) . . ? 
C5 C4 H4 119.2 . . ? 
C3 C4 H4 119.2 . . ? 
C4 C5 C6 119.5(3) . . ? 
C4 C5 H5 120.3 . . ? 
C6 C5 H5 120.3 . . ? 
C1 C6 C5 118.7(3) . . ? 
C1 C6 C9 118.9(3) . . ? 
C5 C6 C9 122.4(3) . . ? 
O1 C7 C2 108.7(2) . . ? 
O1 C7 H7A 109.9 . . ? 
C2 C7 H7A 109.9 . . ? 
O1 C7 H7B 109.9 . . ? 
C2 C7 H7B 109.9 . . ? 
H7A C7 H7B 108.3 . . ? 
O1 C8 H8A 109.5 . . ? 
O1 C8 H8B 109.5 . . ? 
H8A C8 H8B 109.5 . . ? 
O1 C8 H8C 109.5 . . ? 
H8A C8 H8C 109.5 . . ? 
H8B C8 H8C 109.5 . . ? 
O2 C9 C6 108.2(2) . . ? 
O2 C9 H9A 110.1 . . ? 
C6 C9 H9A 110.1 . . ? 
O2 C9 H9B 110.1 . . ? 
C6 C9 H9B 110.1 . . ? 
H9A C9 H9B 108.4 . . ? 
O2 C10 H10A 109.5 . . ? 
O2 C10 H10B 109.5 . . ? 
H10A C10 H10B 109.5 . . ? 
O2 C10 H10C 109.5 . . ? 
H10A C10 H10C 109.5 . . ? 
H10B C10 H10C 109.5 . . ? 
 
_diffrn_measured_fraction_theta_max    0.996 
_diffrn_reflns_theta_full              27.51 
_diffrn_measured_fraction_theta_full   0.996 
_refine_diff_density_max    0.638 
_refine_diff_density_min   -0.756 
_refine_diff_density_rms    0.106 
#===END


 
data_4-sbocoti2-ruzic 
 
_audit_creation_method            SHELXL-97 
_chemical_name_systematic 
; 
 ? 
; 
_chemical_name_common             ? 
_chemical_melting_point           ? 
_chemical_formula_moiety          'C16 H25 I2 O2 Sb' 
_chemical_formula_sum 
 'C16 H25 I2 O2 Sb' 
_chemical_formula_weight          624.91 
_chemical_compound_source         'synthesized by the authors'
 
loop_ 
 _atom_type_symbol 
 _atom_type_description 
 _atom_type_scat_dispersion_real 
 _atom_type_scat_dispersion_imag 
 _atom_type_scat_source 
 'C'  'C'   0.0033   0.0016 
 'International Tables Vol C Tables 4.2.6.8 and 6.1.1.4' 
 'H'  'H'   0.0000   0.0000 
 'International Tables Vol C Tables 4.2.6.8 and 6.1.1.4' 
 'O'  'O'   0.0106   0.0060 
 'International Tables Vol C Tables 4.2.6.8 and 6.1.1.4' 
 'I'  'I'  -0.4742   1.8119 
 'International Tables Vol C Tables 4.2.6.8 and 6.1.1.4' 
 'Sb'  'Sb'  -0.5866   1.5461 
 'International Tables Vol C Tables 4.2.6.8 and 6.1.1.4' 
 
_symmetry_cell_setting            monoclinic 
_symmetry_space_group_name_H-M    'P 21/c' 
_symmetry_space_group_name_Hall   '-P 2ybc'
 
loop_ 
 _symmetry_equiv_pos_as_xyz 
 'x, y, z' 
 '-x, y+1/2, -z+1/2' 
 '-x, -y, -z' 
 'x, -y-1/2, z-1/2' 
 
_cell_length_a                    8.48800(10) 
_cell_length_b                    23.6800(4) 
_cell_length_c                    9.9210(2) 
_cell_angle_alpha                 90.00 
_cell_angle_beta                  94.2910(10) 
_cell_angle_gamma                 90.00 
_cell_volume                      1988.49(6) 
_cell_formula_units_Z             4 
_cell_measurement_temperature     150(2) 
_cell_measurement_reflns_used     22187 
_cell_measurement_theta_min       1 
_cell_measurement_theta_max       27.5 
 
_exptl_crystal_description        plate 
_exptl_crystal_colour             yellow 
_exptl_crystal_size_max           0.175 
_exptl_crystal_size_mid           0.175 
_exptl_crystal_size_min           0.075 
_exptl_crystal_density_meas       ? 
_exptl_crystal_density_diffrn     2.087 
_exptl_crystal_density_method     'not measured' 
_exptl_crystal_F_000              1176 
_exptl_absorpt_coefficient_mu     4.495 
_exptl_absorpt_correction_type    gaussian 
_exptl_absorpt_correction_T_min   0.487 
_exptl_absorpt_correction_T_max   0.746 
_exptl_absorpt_process_details    '(Coppens, 1970)' 
 
_exptl_special_details 
; 
 ? 
; 
 
_diffrn_ambient_temperature       150(2) 
_diffrn_radiation_wavelength      0.71073 
_diffrn_radiation_type            MoK\a 
_diffrn_radiation_source          'fine-focus sealed tube' 
_diffrn_radiation_monochromator   graphite 
_diffrn_measurement_device_type   'Nonius KappaCCD area detector' 
_diffrn_measurement_method        '\f and \w scans to fill the Ewald sphere' 
_diffrn_detector_area_resol_mean  9.091 
_diffrn_standards_number          0 
_diffrn_standards_interval_count  ? 
_diffrn_standards_interval_time   ? 
_diffrn_standards_decay_%         ? 
_diffrn_reflns_number             30742 
_diffrn_reflns_av_R_equivalents   0.0442 
_diffrn_reflns_av_sigmaI/netI     0.0261 
_diffrn_reflns_limit_h_min        -11 
_diffrn_reflns_limit_h_max        11 
_diffrn_reflns_limit_k_min        -30 
_diffrn_reflns_limit_k_max        30 
_diffrn_reflns_limit_l_min        -12 
_diffrn_reflns_limit_l_max        12 
_diffrn_reflns_theta_min          1.72 
_diffrn_reflns_theta_max          27.48 
_reflns_number_total              4556 
_reflns_number_gt                 3989 
_reflns_threshold_expression      I>2\s(I) 
 
_computing_data_collection         
 'COLLECT (Hooft, 1998) and DENZO (Otwinowski & Minor, 1997)'
_computing_cell_refinement        'COLLECT and DENZO' 
_computing_data_reduction         'COLLECT and DENZO' 
_computing_structure_solution     'SIR92 (Altomare et al., 1994)' 
_computing_structure_refinement   'SHELXL-97 (Sheldrick, 1997)' 
_computing_molecular_graphics     ? 
_computing_publication_material   ? 
 
_refine_special_details 
; 
 Refinement of F^2^ against ALL reflections.  The weighted R-factor wR and 
 goodness of fit S are based on F^2^, conventional R-factors R are based 
 on F, with F set to zero for negative F^2^. The threshold expression of 
 F^2^ > 2sigma(F^2^) is used only for calculating R-factors(gt) etc. and is 
 not relevant to the choice of reflections for refinement.  R-factors based 
 on F^2^ are statistically about twice as large as those based on F, and R- 
 factors based on ALL data will be even larger. 
; 
 
_refine_ls_structure_factor_coef  Fsqd  
_refine_ls_matrix_type            full 
_refine_ls_weighting_scheme       calc  
_refine_ls_weighting_details 
 'calc w=1/[\s^2^(Fo^2^)+(0.0208P)^2^+2.7328P] where P=(Fo^2^+2Fc^2^)/3' 
_atom_sites_solution_primary      direct 
_atom_sites_solution_secondary    difmap 
_atom_sites_solution_hydrogens    difmap 
_refine_ls_hydrogen_treatment     constr 
_refine_ls_extinction_method      none 
_refine_ls_extinction_coef        ? 
_refine_ls_number_reflns          4556 
_refine_ls_number_parameters      196 
_refine_ls_number_restraints      0 
_refine_ls_R_factor_all           0.0321 
_refine_ls_R_factor_gt            0.0251 
_refine_ls_wR_factor_ref          0.0563 
_refine_ls_wR_factor_gt           0.0531 
_refine_ls_goodness_of_fit_ref    1.128 
_refine_ls_restrained_S_all       1.128 
_refine_ls_shift/su_max           0.001 
_refine_ls_shift/su_mean          0.000 
 
loop_ 
 _atom_site_label 
 _atom_site_type_symbol 
 _atom_site_fract_x 
 _atom_site_fract_y 
 _atom_site_fract_z 
 _atom_site_U_iso_or_equiv 
 _atom_site_adp_type 
 _atom_site_occupancy 
 _atom_site_symmetry_multiplicity 
 _atom_site_calc_flag 
 _atom_site_refinement_flags 
 _atom_site_disorder_assembly 
 _atom_site_disorder_group 
Sb1 Sb 0.49258(2) 0.104604(8) 0.64759(2) 0.01646(6) Uani 1 1 d . . . 
I1 I 0.28817(3) 0.070395(9) 0.40991(2) 0.02584(7) Uani 1 1 d . . . 
I2 I 0.72488(2) 0.135389(9) 0.89107(2) 0.02447(6) Uani 1 1 d . . . 
O1 O 0.6278(2) 0.16498(9) 0.5156(2) 0.0199(5) Uani 1 1 d . . . 
O2 O 0.2914(2) 0.09226(9) 0.7942(2) 0.0193(4) Uani 1 1 d . . . 
C1 C 0.3786(3) 0.18353(12) 0.6585(3) 0.0175(6) Uani 1 1 d . . . 
C2 C 0.4336(4) 0.22908(13) 0.5885(3) 0.0207(6) Uani 1 1 d . . . 
C3 C 0.3666(4) 0.28214(14) 0.6028(4) 0.0262(7) Uani 1 1 d . . . 
H3 H 0.4039 0.3130 0.5568 0.031 Uiso 1 1 calc R . . 
C4 C 0.2441(4) 0.28862(14) 0.6861(4) 0.0274(7) Uani 1 1 d . . . 
H4 H 0.1999 0.3241 0.6968 0.033 Uiso 1 1 calc R . . 
C5 C 0.1868(4) 0.24296(14) 0.7535(4) 0.0256(7) Uani 1 1 d . . . 
H5 H 0.1035 0.2477 0.8083 0.031 Uiso 1 1 calc R . . 
C6 C 0.2534(3) 0.19003(13) 0.7396(3) 0.0206(6) Uani 1 1 d . . . 
C7 C 0.5622(4) 0.22074(14) 0.4938(4) 0.0296(8) Uani 1 1 d . . . 
H7A H 0.5192 0.2246 0.4009 0.036 Uiso 1 1 calc R . . 
H7B H 0.6439 0.2490 0.5109 0.036 Uiso 1 1 calc R . . 
C8 C 0.7781(4) 0.15329(14) 0.4517(3) 0.0239(7) Uani 1 1 d . . . 
C9 C 0.7511(5) 0.16210(19) 0.3002(4) 0.0431(10) Uani 1 1 d . . . 
H9A H 0.6611 0.1405 0.2661 0.065 Uiso 1 1 calc R . . 
H9B H 0.8428 0.1500 0.2570 0.065 Uiso 1 1 calc R . . 
H9C H 0.7323 0.2014 0.2817 0.065 Uiso 1 1 calc R . . 
C10 C 0.9052(4) 0.19178(15) 0.5156(4) 0.0333(8) Uani 1 1 d . . . 
H10A H 0.8856 0.2298 0.4855 0.050 Uiso 1 1 calc R . . 
H10B H 1.0066 0.1797 0.4896 0.050 Uiso 1 1 calc R . . 
H10C H 0.9040 0.1902 0.6122 0.050 Uiso 1 1 calc R . . 
C11 C 0.8151(4) 0.09233(15) 0.4861(4) 0.0302(8) Uani 1 1 d . . . 
H11A H 0.8271 0.0879 0.5826 0.045 Uiso 1 1 calc R . . 
H11B H 0.9114 0.0816 0.4481 0.045 Uiso 1 1 calc R . . 
H11C H 0.7304 0.0687 0.4497 0.045 Uiso 1 1 calc R . . 
C12 C 0.1879(4) 0.13961(13) 0.8078(4) 0.0254(7) Uani 1 1 d . . . 
H12A H 0.1789 0.1477 0.9028 0.031 Uiso 1 1 calc R . . 
H12B H 0.0835 0.1308 0.7668 0.031 Uiso 1 1 calc R . . 
C13 C 0.2427(4) 0.03826(13) 0.8547(3) 0.0226(7) Uani 1 1 d . . . 
C14 C 0.3777(4) -0.00191(14) 0.8330(4) 0.0266(7) Uani 1 1 d . . . 
H14A H 0.3862 -0.0071 0.7378 0.040 Uiso 1 1 calc R . . 
H14B H 0.3577 -0.0377 0.8741 0.040 Uiso 1 1 calc R . . 
H14C H 0.4745 0.0136 0.8733 0.040 Uiso 1 1 calc R . . 
C15 C 0.2256(5) 0.04746(16) 1.0046(4) 0.0359(9) Uani 1 1 d . . . 
H15A H 0.3178 0.0664 1.0443 0.054 Uiso 1 1 calc R . . 
H15B H 0.2144 0.0116 1.0481 0.054 Uiso 1 1 calc R . . 
H15C H 0.1339 0.0702 1.0160 0.054 Uiso 1 1 calc R . . 
C16 C 0.0899(4) 0.01777(15) 0.7806(4) 0.0318(8) Uani 1 1 d . . . 
H16A H 0.0046 0.0421 0.8017 0.048 Uiso 1 1 calc R . . 
H16B H 0.0682 -0.0201 0.8085 0.048 Uiso 1 1 calc R . . 
H16C H 0.1004 0.0184 0.6850 0.048 Uiso 1 1 calc R . . 
 
loop_ 
 _atom_site_aniso_label 
 _atom_site_aniso_U_11 
 _atom_site_aniso_U_22 
 _atom_site_aniso_U_33 
 _atom_site_aniso_U_23 
 _atom_site_aniso_U_13 
 _atom_site_aniso_U_12 
Sb1 0.01542(10) 0.01603(10) 0.01818(11) 0.00050(8) 0.00293(8) 0.00084(7) 
I1 0.02578(12) 0.02855(12) 0.02280(12) -0.00260(9) -0.00083(9) -0.00253(8) 
I2 0.02469(11) 0.02566(12) 0.02275(12) -0.00321(8) -0.00021(9) 0.00321(8) 
O1 0.0169(10) 0.0194(11) 0.0243(12) 0.0034(9) 0.0069(9) -0.0007(8) 
O2 0.0182(10) 0.0176(10) 0.0228(12) 0.0010(9) 0.0068(9) 0.0025(8) 
C1 0.0159(14) 0.0164(14) 0.0198(16) -0.0022(12) -0.0009(12) 0.0012(11) 
C2 0.0199(15) 0.0191(15) 0.0233(17) 0.0018(13) 0.0018(13) -0.0001(12) 
C3 0.0288(17) 0.0195(16) 0.0295(19) 0.0033(14) -0.0025(14) 0.0001(13) 
C4 0.0300(17) 0.0186(15) 0.033(2) -0.0051(14) 0.0010(15) 0.0042(13) 
C5 0.0235(16) 0.0258(17) 0.0279(19) -0.0054(14) 0.0041(14) 0.0027(13) 
C6 0.0178(14) 0.0221(15) 0.0215(17) -0.0022(13) -0.0011(12) 0.0017(12) 
C7 0.0304(18) 0.0211(16) 0.039(2) 0.0086(15) 0.0112(16) 0.0026(14) 
C8 0.0191(15) 0.0304(17) 0.0233(18) 0.0023(14) 0.0073(13) 0.0010(13) 
C9 0.047(2) 0.061(3) 0.023(2) 0.0028(19) 0.0120(18) 0.014(2) 
C10 0.0213(16) 0.0308(19) 0.048(2) 0.0054(17) 0.0038(16) -0.0041(14) 
C11 0.0270(17) 0.0301(18) 0.035(2) -0.0026(16) 0.0103(15) 0.0040(14) 
C12 0.0198(15) 0.0230(16) 0.034(2) -0.0002(14) 0.0075(14) 0.0041(13) 
C13 0.0238(16) 0.0207(15) 0.0238(17) 0.0066(13) 0.0053(13) -0.0002(13) 
C14 0.0281(17) 0.0226(16) 0.0297(19) 0.0064(14) 0.0059(15) 0.0028(13) 
C15 0.048(2) 0.035(2) 0.027(2) 0.0072(16) 0.0152(17) 0.0093(17) 
C16 0.0257(17) 0.0261(17) 0.044(2) 0.0013(16) 0.0062(16) -0.0043(14) 
 
_geom_special_details 
; 
 All esds (except the esd in the dihedral angle between two l.s. planes) 
 are estimated using the full covariance matrix.  The cell esds are taken 
 into account individually in the estimation of esds in distances, angles 
 and torsion angles; correlations between esds in cell parameters are only 
 used when they are defined by crystal symmetry.  An approximate (isotropic) 
 treatment of cell esds is used for estimating esds involving l.s. planes. 
; 
 
loop_ 
 _geom_bond_atom_site_label_1 
 _geom_bond_atom_site_label_2 
 _geom_bond_distance 
 _geom_bond_site_symmetry_2 
 _geom_bond_publ_flag 
Sb1 C1 2.111(3) . ? 
Sb1 O1 2.302(2) . ? 
Sb1 O2 2.343(2) . ? 
Sb1 I1 2.9351(3) . ? 
Sb1 I2 3.0889(3) . ? 
O1 C7 1.443(4) . ? 
O1 C8 1.492(4) . ? 
O2 C12 1.437(4) . ? 
O2 C13 1.484(4) . ? 
C1 C2 1.383(4) . ? 
C1 C6 1.388(4) . ? 
C2 C3 1.391(4) . ? 
C2 C7 1.506(5) . ? 
C3 C4 1.385(5) . ? 
C3 H3 0.9300 . ? 
C4 C5 1.379(5) . ? 
C4 H4 0.9300 . ? 
C5 C6 1.386(4) . ? 
C5 H5 0.9300 . ? 
C6 C12 1.499(4) . ? 
C7 H7A 0.9700 . ? 
C7 H7B 0.9700 . ? 
C8 C11 1.511(5) . ? 
C8 C10 1.515(5) . ? 
C8 C9 1.518(5) . ? 
C9 H9A 0.9600 . ? 
C9 H9B 0.9600 . ? 
C9 H9C 0.9600 . ? 
C10 H10A 0.9600 . ? 
C10 H10B 0.9600 . ? 
C10 H10C 0.9600 . ? 
C11 H11A 0.9600 . ? 
C11 H11B 0.9600 . ? 
C11 H11C 0.9600 . ? 
C12 H12A 0.9700 . ? 
C12 H12B 0.9700 . ? 
C13 C14 1.517(4) . ? 
C13 C15 1.521(5) . ? 
C13 C16 1.522(5) . ? 
C14 H14A 0.9600 . ? 
C14 H14B 0.9600 . ? 
C14 H14C 0.9600 . ? 
C15 H15A 0.9600 . ? 
C15 H15B 0.9600 . ? 
C15 H15C 0.9600 . ? 
C16 H16A 0.9600 . ? 
C16 H16B 0.9600 . ? 
C16 H16C 0.9600 . ? 
 
loop_ 
 _geom_angle_atom_site_label_1 
 _geom_angle_atom_site_label_2 
 _geom_angle_atom_site_label_3 
 _geom_angle 
 _geom_angle_site_symmetry_1 
 _geom_angle_site_symmetry_3 
 _geom_angle_publ_flag 
C1 Sb1 O1 74.30(10) . . ? 
C1 Sb1 O2 73.76(10) . . ? 
O1 Sb1 O2 148.00(7) . . ? 
C1 Sb1 I1 92.28(8) . . ? 
O1 Sb1 I1 90.26(5) . . ? 
O2 Sb1 I1 92.85(5) . . ? 
C1 Sb1 I2 91.10(8) . . ? 
O1 Sb1 I2 88.96(5) . . ? 
O2 Sb1 I2 89.79(5) . . ? 
I1 Sb1 I2 176.184(9) . . ? 
C7 O1 C8 116.0(2) . . ? 
C7 O1 Sb1 116.76(17) . . ? 
C8 O1 Sb1 127.21(17) . . ? 
C12 O2 C13 116.3(2) . . ? 
C12 O2 Sb1 116.11(18) . . ? 
C13 O2 Sb1 126.61(17) . . ? 
C2 C1 C6 120.4(3) . . ? 
C2 C1 Sb1 119.4(2) . . ? 
C6 C1 Sb1 120.1(2) . . ? 
C1 C2 C3 119.8(3) . . ? 
C1 C2 C7 119.9(3) . . ? 
C3 C2 C7 120.2(3) . . ? 
C4 C3 C2 119.5(3) . . ? 
C4 C3 H3 120.3 . . ? 
C2 C3 H3 120.3 . . ? 
C5 C4 C3 120.7(3) . . ? 
C5 C4 H4 119.7 . . ? 
C3 C4 H4 119.7 . . ? 
C4 C5 C6 120.0(3) . . ? 
C4 C5 H5 120.0 . . ? 
C6 C5 H5 120.0 . . ? 
C5 C6 C1 119.6(3) . . ? 
C5 C6 C12 120.5(3) . . ? 
C1 C6 C12 119.9(3) . . ? 
O1 C7 C2 108.4(3) . . ? 
O1 C7 H7A 110.0 . . ? 
C2 C7 H7A 110.0 . . ? 
O1 C7 H7B 110.0 . . ? 
C2 C7 H7B 110.0 . . ? 
H7A C7 H7B 108.4 . . ? 
O1 C8 C11 104.6(2) . . ? 
O1 C8 C10 108.4(3) . . ? 
C11 C8 C10 110.5(3) . . ? 
O1 C8 C9 109.0(3) . . ? 
C11 C8 C9 111.6(3) . . ? 
C10 C8 C9 112.4(3) . . ? 
C8 C9 H9A 109.5 . . ? 
C8 C9 H9B 109.5 . . ? 
H9A C9 H9B 109.5 . . ? 
C8 C9 H9C 109.5 . . ? 
H9A C9 H9C 109.5 . . ? 
H9B C9 H9C 109.5 . . ? 
C8 C10 H10A 109.5 . . ? 
C8 C10 H10B 109.5 . . ? 
H10A C10 H10B 109.5 . . ? 
C8 C10 H10C 109.5 . . ? 
H10A C10 H10C 109.5 . . ? 
H10B C10 H10C 109.5 . . ? 
C8 C11 H11A 109.5 . . ? 
C8 C11 H11B 109.5 . . ? 
H11A C11 H11B 109.5 . . ? 
C8 C11 H11C 109.5 . . ? 
H11A C11 H11C 109.5 . . ? 
H11B C11 H11C 109.5 . . ? 
O2 C12 C6 109.2(2) . . ? 
O2 C12 H12A 109.8 . . ? 
C6 C12 H12A 109.8 . . ? 
O2 C12 H12B 109.8 . . ? 
C6 C12 H12B 109.8 . . ? 
H12A C12 H12B 108.3 . . ? 
O2 C13 C14 104.3(2) . . ? 
O2 C13 C15 108.8(3) . . ? 
C14 C13 C15 110.9(3) . . ? 
O2 C13 C16 109.4(3) . . ? 
C14 C13 C16 110.9(3) . . ? 
C15 C13 C16 112.2(3) . . ? 
C13 C14 H14A 109.5 . . ? 
C13 C14 H14B 109.5 . . ? 
H14A C14 H14B 109.5 . . ? 
C13 C14 H14C 109.5 . . ? 
H14A C14 H14C 109.5 . . ? 
H14B C14 H14C 109.5 . . ? 
C13 C15 H15A 109.5 . . ? 
C13 C15 H15B 109.5 . . ? 
H15A C15 H15B 109.5 . . ? 
C13 C15 H15C 109.5 . . ? 
H15A C15 H15C 109.5 . . ? 
H15B C15 H15C 109.5 . . ? 
C13 C16 H16A 109.5 . . ? 
C13 C16 H16B 109.5 . . ? 
H16A C16 H16B 109.5 . . ? 
C13 C16 H16C 109.5 . . ? 
H16A C16 H16C 109.5 . . ? 
H16B C16 H16C 109.5 . . ? 
 
_diffrn_measured_fraction_theta_max    1.000 
_diffrn_reflns_theta_full              27.48 
_diffrn_measured_fraction_theta_full   1.000 
_refine_diff_density_max    0.747 
_refine_diff_density_min   -0.936 
_refine_diff_density_rms    0.132 
#===END
 
 
data_5-biocomcl2-ruzic 
 
_audit_creation_method            SHELXL-97 
_chemical_name_systematic 
; 
 ? 
; 
_chemical_name_common             ? 
_chemical_melting_point           ? 
_chemical_formula_moiety          'C20 H26 Bi2 Cl4 O4' 
_chemical_formula_sum 
 'C20 H26 Bi2 Cl4 O4' 
_chemical_formula_weight          890.17 
_chemical_compound_source         'synthesized by the authors'
 
loop_ 
 _atom_type_symbol 
 _atom_type_description 
 _atom_type_scat_dispersion_real 
 _atom_type_scat_dispersion_imag 
 _atom_type_scat_source 
 'C'  'C'   0.0033   0.0016 
 'International Tables Vol C Tables 4.2.6.8 and 6.1.1.4' 
 'H'  'H'   0.0000   0.0000 
 'International Tables Vol C Tables 4.2.6.8 and 6.1.1.4' 
 'O'  'O'   0.0106   0.0060 
 'International Tables Vol C Tables 4.2.6.8 and 6.1.1.4' 
 'Cl'  'Cl'   0.1484   0.1585 
 'International Tables Vol C Tables 4.2.6.8 and 6.1.1.4' 
 'Bi'  'Bi'  -4.1077  10.2566 
 'International Tables Vol C Tables 4.2.6.8 and 6.1.1.4' 
 
_symmetry_cell_setting            triclinic 
_symmetry_space_group_name_H-M    'P -1' 
_symmetry_space_group_name_Hall   '-P 1'
 
loop_ 
 _symmetry_equiv_pos_as_xyz 
 'x, y, z' 
 '-x, -y, -z' 
 
_cell_length_a                    8.4310(3) 
_cell_length_b                    8.9130(2) 
_cell_length_c                    9.3080(3) 
_cell_angle_alpha                 67.2420(17) 
_cell_angle_beta                  78.6410(16) 
_cell_angle_gamma                 77.3490(19) 
_cell_volume                      624.43(3) 
_cell_formula_units_Z             1 
_cell_measurement_temperature     150(2) 
_cell_measurement_reflns_used     6295 
_cell_measurement_theta_min       1 
_cell_measurement_theta_max       27.5 
 
_exptl_crystal_description        prism 
_exptl_crystal_colour             colourless 
_exptl_crystal_size_max           0.25 
_exptl_crystal_size_mid           0.2 
_exptl_crystal_size_min           0.1 
_exptl_crystal_density_meas       ? 
_exptl_crystal_density_diffrn     2.367 
_exptl_crystal_density_method     'not measured' 
_exptl_crystal_F_000              412 
_exptl_absorpt_coefficient_mu     14.523 
_exptl_absorpt_correction_type    gaussian 
_exptl_absorpt_correction_T_min   0.098 
_exptl_absorpt_correction_T_max   0.342 
_exptl_absorpt_process_details    '(Coppens, 1970)' 
 
_exptl_special_details 
; 
 ? 
; 
 
_diffrn_ambient_temperature       150(2) 
_diffrn_radiation_wavelength      0.71073 
_diffrn_radiation_type            MoK\a 
_diffrn_radiation_source          'fine-focus sealed tube' 
_diffrn_radiation_monochromator   graphite 
_diffrn_measurement_device_type   'Nonius KappaCCD area detector' 
_diffrn_measurement_method        '\f and \w scans to fill the Ewald sphere' 
_diffrn_detector_area_resol_mean  9.091 
_diffrn_standards_number          0 
_diffrn_standards_interval_count  ? 
_diffrn_standards_interval_time   ? 
_diffrn_standards_decay_%         ? 
_diffrn_reflns_number             10467 
_diffrn_reflns_av_R_equivalents   0.0516 
_diffrn_reflns_av_sigmaI/netI     0.0338 
_diffrn_reflns_limit_h_min        -10 
_diffrn_reflns_limit_h_max        10 
_diffrn_reflns_limit_k_min        -11 
_diffrn_reflns_limit_k_max        11 
_diffrn_reflns_limit_l_min        -12 
_diffrn_reflns_limit_l_max        12 
_diffrn_reflns_theta_min          2.50 
_diffrn_reflns_theta_max          27.53 
_reflns_number_total              2853 
_reflns_number_gt                 2752 
_reflns_threshold_expression      I>2\sigma(I) 
 
_computing_data_collection         
 'COLLECT (Hooft, 1998) and DENZO (Otwinowski & Minor, 1997)'
_computing_cell_refinement        'COLLECT and DENZO' 
_computing_data_reduction         'COLLECT and DENZO' 
_computing_structure_solution     'SIR92 (Altomare et al., 1994)' 
_computing_structure_refinement   'SHELXL-97 (Sheldrick, 1997)' 
_computing_molecular_graphics     ? 
_computing_publication_material   ? 
 
_refine_special_details 
; 
 Refinement of F^2^ against ALL reflections.  The weighted R-factor wR and 
 goodness of fit S are based on F^2^, conventional R-factors R are based 
 on F, with F set to zero for negative F^2^. The threshold expression of 
 F^2^ > 2sigma(F^2^) is used only for calculating R-factors(gt) etc. and is 
 not relevant to the choice of reflections for refinement.  R-factors based 
 on F^2^ are statistically about twice as large as those based on F, and R- 
 factors based on ALL data will be even larger. 
; 
 
_refine_ls_structure_factor_coef  Fsqd  
_refine_ls_matrix_type            full 
_refine_ls_weighting_scheme       calc  
_refine_ls_weighting_details 
 'calc w=1/[\s^2^(Fo^2^)+(0.0264P)^2^+0.9244P] where P=(Fo^2^+2Fc^2^)/3' 
_atom_sites_solution_primary      direct 
_atom_sites_solution_secondary    difmap 
_atom_sites_solution_hydrogens    calc 
_refine_ls_hydrogen_treatment     constr 
_refine_ls_extinction_method      SHELXL 
_refine_ls_extinction_coef        0.0090(5) 
_refine_ls_extinction_expression 
 'Fc^*^=kFc[1+0.001xFc^2^\l^3^/sin(2\q)]^-1/4^' 
_refine_ls_number_reflns          2853 
_refine_ls_number_parameters      139 
_refine_ls_number_restraints      0 
_refine_ls_R_factor_all           0.0233 
_refine_ls_R_factor_gt            0.0224 
_refine_ls_wR_factor_ref          0.0549 
_refine_ls_wR_factor_gt           0.0544 
_refine_ls_goodness_of_fit_ref    1.096 
_refine_ls_restrained_S_all       1.096 
_refine_ls_shift/su_max           0.001 
_refine_ls_shift/su_mean          0.000 
 
loop_ 
 _atom_site_label 
 _atom_site_type_symbol 
 _atom_site_fract_x 
 _atom_site_fract_y 
 _atom_site_fract_z 
 _atom_site_U_iso_or_equiv 
 _atom_site_adp_type 
 _atom_site_occupancy 
 _atom_site_symmetry_multiplicity 
 _atom_site_calc_flag 
 _atom_site_refinement_flags 
 _atom_site_disorder_assembly 
 _atom_site_disorder_group 
Bi1 Bi 0.773460(15) 0.438335(15) 0.418171(15) 0.01385(8) Uani 1 1 d . . . 
Cl1 Cl 1.09611(12) 0.41667(12) 0.33862(12) 0.0187(2) Uani 1 1 d . . . 
Cl2 Cl 0.52581(12) 0.35016(12) 0.68576(12) 0.0207(2) Uani 1 1 d . . . 
O1 O 0.8666(3) 0.1552(4) 0.6010(4) 0.0193(6) Uani 1 1 d . . . 
O2 O 0.8058(4) 0.5408(4) 0.1247(3) 0.0189(6) Uani 1 1 d . . . 
C1 C 0.7321(5) 0.2496(5) 0.3344(5) 0.0161(8) Uani 1 1 d . . . 
C2 C 0.7330(5) 0.0862(5) 0.4367(5) 0.0191(8) Uani 1 1 d . . . 
C3 C 0.6874(5) -0.0261(5) 0.3885(6) 0.0220(9) Uani 1 1 d . . . 
H3 H 0.6838 -0.1340 0.4573 0.026 Uiso 1 1 calc R . . 
C4 C 0.6474(5) 0.0232(5) 0.2373(6) 0.0237(9) Uani 1 1 d . . . 
H4 H 0.6156 -0.0520 0.2061 0.028 Uiso 1 1 calc R . . 
C5 C 0.6542(5) 0.1829(5) 0.1323(5) 0.0214(9) Uani 1 1 d . . . 
H5 H 0.6312 0.2131 0.0302 0.026 Uiso 1 1 calc R . . 
C6 C 0.6956(5) 0.2985(5) 0.1800(5) 0.0191(8) Uani 1 1 d . . . 
C7 C 0.7825(5) 0.0332(5) 0.5973(5) 0.0198(8) Uani 1 1 d . . . 
H7A H 0.6862 0.0215 0.6751 0.024 Uiso 1 1 calc R . . 
H7B H 0.8538 -0.0725 0.6216 0.024 Uiso 1 1 calc R . . 
C8 C 0.9077(6) 0.1208(6) 0.7533(5) 0.0239(9) Uani 1 1 d . . . 
H8A H 0.8096 0.1169 0.8264 0.036 Uiso 1 1 calc R . . 
H8B H 0.9630 0.2058 0.7499 0.036 Uiso 1 1 calc R . . 
H8C H 0.9784 0.0165 0.7862 0.036 Uiso 1 1 calc R . . 
C9 C 0.7050(5) 0.4707(5) 0.0675(5) 0.0199(8) Uani 1 1 d . . . 
H9A H 0.7521 0.4701 -0.0361 0.024 Uiso 1 1 calc R . . 
H9B H 0.5962 0.5354 0.0603 0.024 Uiso 1 1 calc R . . 
C10 C 0.8284(6) 0.7048(5) 0.0204(5) 0.0263(10) Uani 1 1 d . . . 
H10A H 0.8804 0.7024 -0.0803 0.039 Uiso 1 1 calc R . . 
H10B H 0.8960 0.7469 0.0630 0.039 Uiso 1 1 calc R . . 
H10C H 0.7238 0.7747 0.0089 0.039 Uiso 1 1 calc R . . 
 
loop_ 
 _atom_site_aniso_label 
 _atom_site_aniso_U_11 
 _atom_site_aniso_U_22 
 _atom_site_aniso_U_33 
 _atom_site_aniso_U_23 
 _atom_site_aniso_U_13 
 _atom_site_aniso_U_12 
Bi1 0.01497(11) 0.01547(10) 0.01135(10) -0.00532(7) -0.00100(6) -0.00253(6) 
Cl1 0.0169(4) 0.0242(5) 0.0159(5) -0.0085(4) 0.0001(4) -0.0045(4) 
Cl2 0.0196(5) 0.0202(5) 0.0166(5) -0.0036(4) 0.0002(4) 0.0003(4) 
O1 0.0207(14) 0.0200(14) 0.0167(15) -0.0046(12) -0.0039(12) -0.0045(12) 
O2 0.0224(14) 0.0197(14) 0.0131(14) -0.0025(12) -0.0030(12) -0.0061(11) 
C1 0.0144(18) 0.0186(19) 0.017(2) -0.0094(16) 0.0003(15) -0.0019(15) 
C2 0.0164(19) 0.021(2) 0.020(2) -0.0105(18) 0.0037(16) -0.0024(15) 
C3 0.021(2) 0.019(2) 0.025(2) -0.0082(18) 0.0015(18) -0.0047(16) 
C4 0.020(2) 0.025(2) 0.033(3) -0.019(2) -0.0018(18) -0.0041(17) 
C5 0.020(2) 0.028(2) 0.022(2) -0.0154(19) -0.0025(17) -0.0030(17) 
C6 0.019(2) 0.023(2) 0.017(2) -0.0102(18) -0.0019(16) -0.0008(16) 
C7 0.022(2) 0.0179(19) 0.018(2) -0.0066(17) 0.0019(17) -0.0029(16) 
C8 0.029(2) 0.026(2) 0.013(2) -0.0016(18) -0.0061(18) -0.0029(18) 
C9 0.024(2) 0.024(2) 0.013(2) -0.0077(17) -0.0052(17) -0.0029(17) 
C10 0.041(3) 0.020(2) 0.014(2) -0.0003(18) -0.0016(19) -0.0113(19) 
 
_geom_special_details 
; 
 All esds (except the esd in the dihedral angle between two l.s. planes) 
 are estimated using the full covariance matrix.  The cell esds are taken 
 into account individually in the estimation of esds in distances, angles 
 and torsion angles; correlations between esds in cell parameters are only 
 used when they are defined by crystal symmetry.  An approximate (isotropic) 
 treatment of cell esds is used for estimating esds involving l.s. planes. 
; 
 
loop_ 
 _geom_bond_atom_site_label_1 
 _geom_bond_atom_site_label_2 
 _geom_bond_distance 
 _geom_bond_site_symmetry_2 
 _geom_bond_publ_flag 
Bi1 C1 2.222(4) . ? 
Bi1 O1 2.493(3) . ? 
Bi1 O2 2.501(3) . ? 
Bi1 Cl1 2.6595(10) . ? 
Bi1 Cl2 2.8850(10) 2_666 ? 
Bi1 Cl2 2.8873(10) . ? 
Cl2 Bi1 2.8850(10) 2_666 ? 
O1 C8 1.426(5) . ? 
O1 C7 1.437(5) . ? 
O2 C9 1.436(5) . ? 
O2 C10 1.438(5) . ? 
C1 C2 1.398(6) . ? 
C1 C6 1.408(6) . ? 
C2 C3 1.391(6) . ? 
C2 C7 1.498(6) . ? 
C3 C4 1.390(7) . ? 
C3 H3 0.9300 . ? 
C4 C5 1.386(7) . ? 
C4 H4 0.9300 . ? 
C5 C6 1.398(6) . ? 
C5 H5 0.9300 . ? 
C6 C9 1.496(6) . ? 
C7 H7A 0.9700 . ? 
C7 H7B 0.9700 . ? 
C8 H8A 0.9600 . ? 
C8 H8B 0.9600 . ? 
C8 H8C 0.9600 . ? 
C9 H9A 0.9700 . ? 
C9 H9B 0.9700 . ? 
C10 H10A 0.9600 . ? 
C10 H10B 0.9600 . ? 
C10 H10C 0.9600 . ? 
 
loop_ 
 _geom_angle_atom_site_label_1 
 _geom_angle_atom_site_label_2 
 _geom_angle_atom_site_label_3 
 _geom_angle 
 _geom_angle_site_symmetry_1 
 _geom_angle_site_symmetry_3 
 _geom_angle_publ_flag 
C1 Bi1 O1 69.25(12) . . ? 
C1 Bi1 O2 69.17(12) . . ? 
O1 Bi1 O2 127.50(10) . . ? 
C1 Bi1 Cl1 98.37(10) . . ? 
O1 Bi1 Cl1 79.39(7) . . ? 
O2 Bi1 Cl1 76.44(7) . . ? 
C1 Bi1 Cl2 92.12(10) . 2_666 ? 
O1 Bi1 Cl2 139.59(7) . 2_666 ? 
O2 Bi1 Cl2 71.78(7) . 2_666 ? 
Cl1 Bi1 Cl2 140.26(3) . 2_666 ? 
C1 Bi1 Cl2 92.66(11) . . ? 
O1 Bi1 Cl2 71.05(7) . . ? 
O2 Bi1 Cl2 140.69(7) . . ? 
Cl1 Bi1 Cl2 142.28(3) . . ? 
Cl2 Bi1 Cl2 74.54(3) 2_666 . ? 
Bi1 Cl2 Bi1 105.46(3) 2_666 . ? 
C8 O1 C7 112.6(3) . . ? 
C8 O1 Bi1 123.5(3) . . ? 
C7 O1 Bi1 113.1(2) . . ? 
C9 O2 C10 112.2(3) . . ? 
C9 O2 Bi1 112.0(2) . . ? 
C10 O2 Bi1 126.1(3) . . ? 
C2 C1 C6 120.4(4) . . ? 
C2 C1 Bi1 120.3(3) . . ? 
C6 C1 Bi1 119.2(3) . . ? 
C3 C2 C1 119.6(4) . . ? 
C3 C2 C7 120.5(4) . . ? 
C1 C2 C7 119.9(4) . . ? 
C4 C3 C2 119.9(4) . . ? 
C4 C3 H3 120.1 . . ? 
C2 C3 H3 120.1 . . ? 
C5 C4 C3 121.0(4) . . ? 
C5 C4 H4 119.5 . . ? 
C3 C4 H4 119.5 . . ? 
C4 C5 C6 119.9(4) . . ? 
C4 C5 H5 120.1 . . ? 
C6 C5 H5 120.1 . . ? 
C5 C6 C1 119.1(4) . . ? 
C5 C6 C9 120.5(4) . . ? 
C1 C6 C9 120.4(4) . . ? 
O1 C7 C2 108.8(3) . . ? 
O1 C7 H7A 109.9 . . ? 
C2 C7 H7A 109.9 . . ? 
O1 C7 H7B 109.9 . . ? 
C2 C7 H7B 109.9 . . ? 
H7A C7 H7B 108.3 . . ? 
O1 C8 H8A 109.5 . . ? 
O1 C8 H8B 109.5 . . ? 
H8A C8 H8B 109.5 . . ? 
O1 C8 H8C 109.5 . . ? 
H8A C8 H8C 109.5 . . ? 
H8B C8 H8C 109.5 . . ? 
O2 C9 C6 107.9(3) . . ? 
O2 C9 H9A 110.1 . . ? 
C6 C9 H9A 110.1 . . ? 
O2 C9 H9B 110.1 . . ? 
C6 C9 H9B 110.1 . . ? 
H9A C9 H9B 108.4 . . ? 
O2 C10 H10A 109.5 . . ? 
O2 C10 H10B 109.5 . . ? 
H10A C10 H10B 109.5 . . ? 
O2 C10 H10C 109.5 . . ? 
H10A C10 H10C 109.5 . . ? 
H10B C10 H10C 109.5 . . ? 
 
_diffrn_measured_fraction_theta_max    0.996 
_diffrn_reflns_theta_full              27.53 
_diffrn_measured_fraction_theta_full   0.996 
_refine_diff_density_max    1.312 
_refine_diff_density_min   -2.484 
_refine_diff_density_rms    0.176 
#===END


data_6-ocotbicl2-ruzic 
 
_audit_creation_method            SHELXL-97 
_chemical_name_systematic 
; 
 ? 
; 
_chemical_name_common             ? 
_chemical_melting_point           ? 
_chemical_formula_moiety          'C16 H25 Bi Cl2 O2' 
_chemical_formula_sum 
 'C16 H25 Bi Cl2 O2' 
_chemical_formula_weight          529.24 
_chemical_compound_source         'synthesized by the authors'
 
loop_ 
 _atom_type_symbol 
 _atom_type_description 
 _atom_type_scat_dispersion_real 
 _atom_type_scat_dispersion_imag 
 _atom_type_scat_source 
 'C'  'C'   0.0033   0.0016 
 'International Tables Vol C Tables 4.2.6.8 and 6.1.1.4' 
 'H'  'H'   0.0000   0.0000 
 'International Tables Vol C Tables 4.2.6.8 and 6.1.1.4' 
 'O'  'O'   0.0106   0.0060 
 'International Tables Vol C Tables 4.2.6.8 and 6.1.1.4' 
 'Cl'  'Cl'   0.1484   0.1585 
 'International Tables Vol C Tables 4.2.6.8 and 6.1.1.4' 
 'Bi'  'Bi'  -4.1077  10.2566 
 'International Tables Vol C Tables 4.2.6.8 and 6.1.1.4' 
 
_symmetry_cell_setting            monoclinic 
_symmetry_space_group_name_H-M    'P 21/n' 
_symmetry_space_group_name_Hall   '-P 2yn'
 
loop_ 
 _symmetry_equiv_pos_as_xyz 
 'x, y, z' 
 '-x+1/2, y+1/2, -z+1/2' 
 '-x, -y, -z' 
 'x-1/2, -y-1/2, z-1/2' 
 
_cell_length_a                    12.7470(2) 
_cell_length_b                    9.3590(2) 
_cell_length_c                    16.8500(3) 
_cell_angle_alpha                 90.00 
_cell_angle_beta                  109.4640(12) 
_cell_angle_gamma                 90.00 
_cell_volume                      1895.31(6) 
_cell_formula_units_Z             4 
_cell_measurement_temperature     150(2) 
_cell_measurement_reflns_used     18434 
_cell_measurement_theta_min       1 
_cell_measurement_theta_max       27.5 
 
_exptl_crystal_description        prism 
_exptl_crystal_colour             colourless 
_exptl_crystal_size_max           0.25 
_exptl_crystal_size_mid           0.18 
_exptl_crystal_size_min           0.15 
_exptl_crystal_density_meas       ? 
_exptl_crystal_density_diffrn     1.855 
_exptl_crystal_density_method     'not measured' 
_exptl_crystal_F_000              1016 
_exptl_absorpt_coefficient_mu     9.586 
_exptl_absorpt_correction_type    gaussian 
_exptl_absorpt_correction_T_min   0.161 
_exptl_absorpt_correction_T_max   0.329 
_exptl_absorpt_process_details    '(Coppens, 1970)' 
 
_exptl_special_details 
; 
 ? 
; 
 
_diffrn_ambient_temperature       150(2) 
_diffrn_radiation_wavelength      0.71073 
_diffrn_radiation_type            MoK\a 
_diffrn_radiation_source          'fine-focus sealed tube' 
_diffrn_radiation_monochromator   graphite 
_diffrn_measurement_device_type   'Nonius KappaCCD area detector' 
_diffrn_measurement_method        '\f and \w scans to fill the Ewald sphere' 
_diffrn_detector_area_resol_mean  9.091 
_diffrn_standards_number          0 
_diffrn_standards_interval_count  ? 
_diffrn_standards_interval_time   ? 
_diffrn_standards_decay_%         ? 
_diffrn_reflns_number             26505 
_diffrn_reflns_av_R_equivalents   0.0918 
_diffrn_reflns_av_sigmaI/netI     0.0409 
_diffrn_reflns_limit_h_min        -16 
_diffrn_reflns_limit_h_max        16 
_diffrn_reflns_limit_k_min        -12 
_diffrn_reflns_limit_k_max        12 
_diffrn_reflns_limit_l_min        -21 
_diffrn_reflns_limit_l_max        21 
_diffrn_reflns_theta_min          1.75 
_diffrn_reflns_theta_max          27.48 
_reflns_number_total              4344 
_reflns_number_gt                 3855 
_reflns_threshold_expression      I>2\s(I) 
 
_computing_data_collection         
 'COLLECT (Hooft, 1998) and DENZO (Otwinowski & Minor, 1997)'
_computing_cell_refinement        'COLLECT and DENZO' 
_computing_data_reduction         'COLLECT and DENZO' 
_computing_structure_solution      'SIR92 (Altomare et al., 1994)' 
_computing_structure_refinement   'SHELXL-97 (Sheldrick, 1997)' 
_computing_molecular_graphics     ? 
_computing_publication_material   ? 
 
_refine_special_details 
; 
 Refinement of F^2^ against ALL reflections.  The weighted R-factor wR and 
 goodness of fit S are based on F^2^, conventional R-factors R are based 
 on F, with F set to zero for negative F^2^. The threshold expression of 
 F^2^ > 2sigma(F^2^) is used only for calculating R-factors(gt) etc. and is 
 not relevant to the choice of reflections for refinement.  R-factors based 
 on F^2^ are statistically about twice as large as those based on F, and R- 
 factors based on ALL data will be even larger. 
; 
 
_refine_ls_structure_factor_coef  Fsqd  
_refine_ls_matrix_type            full 
_refine_ls_weighting_scheme       calc  
_refine_ls_weighting_details 
 'calc w=1/[\s^2^(Fo^2^)+(0.0287P)^2^+3.5904P] where P=(Fo^2^+2Fc^2^)/3' 
_atom_sites_solution_primary      direct 
_atom_sites_solution_secondary    difmap 
_atom_sites_solution_hydrogens    geom 
_refine_ls_hydrogen_treatment     constr     
_refine_ls_extinction_method      SHELXL 
_refine_ls_extinction_coef        0.00138(14) 
_refine_ls_extinction_expression 
 'Fc^*^=kFc[1+0.001xFc^2^\l^3^/sin(2\q)]^-1/4^' 
_refine_ls_number_reflns          4344 
_refine_ls_number_parameters      197 
_refine_ls_number_restraints      0 
_refine_ls_R_factor_all           0.0331 
_refine_ls_R_factor_gt            0.0275 
_refine_ls_wR_factor_ref          0.0687 
_refine_ls_wR_factor_gt           0.0658 
_refine_ls_goodness_of_fit_ref    1.066 
_refine_ls_restrained_S_all       1.066 
_refine_ls_shift/su_max           0.002 
_refine_ls_shift/su_mean          0.000 
 
loop_ 
 _atom_site_label 
 _atom_site_type_symbol 
 _atom_site_fract_x 
 _atom_site_fract_y 
 _atom_site_fract_z 
 _atom_site_U_iso_or_equiv 
 _atom_site_adp_type 
 _atom_site_occupancy 
 _atom_site_symmetry_multiplicity 
 _atom_site_calc_flag 
 _atom_site_refinement_flags 
 _atom_site_disorder_assembly 
 _atom_site_disorder_group 
Bi1 Bi 0.940078(11) 0.112472(16) 0.617833(8) 0.01655(7) Uani 1 1 d . . . 
Cl1 Cl 0.80087(10) 0.32461(14) 0.62366(7) 0.0344(3) Uani 1 1 d . . . 
Cl2 Cl 1.09821(9) -0.07248(13) 0.61123(6) 0.0280(2) Uani 1 1 d . . . 
O1 O 1.0839(2) 0.2815(3) 0.67758(16) 0.0217(6) Uani 1 1 d . . . 
O2 O 0.8251(2) -0.0723(4) 0.65242(18) 0.0257(7) Uani 1 1 d . . . 
C1 C 0.9952(3) 0.0863(4) 0.7553(2) 0.0187(8) Uani 1 1 d . . . 
C2 C 1.0730(3) 0.1822(5) 0.8055(2) 0.0207(8) Uani 1 1 d . . . 
C3 C 1.1126(4) 0.1611(5) 0.8928(3) 0.0244(9) Uani 1 1 d . . . 
H3 H 1.1652 0.2233 0.9272 0.029 Uiso 1 1 calc R . . 
C4 C 1.0738(4) 0.0480(5) 0.9278(2) 0.0252(9) Uani 1 1 d . . . 
H4 H 1.1009 0.0346 0.9858 0.030 Uiso 1 1 calc R . . 
C5 C 0.9953(4) -0.0455(5) 0.8781(3) 0.0249(9) Uani 1 1 d . . . 
H5 H 0.9691 -0.1204 0.9025 0.030 Uiso 1 1 calc R . . 
C6 C 0.9557(3) -0.0267(5) 0.7907(2) 0.0207(8) Uani 1 1 d . . . 
C7 C 1.1127(4) 0.3058(5) 0.7671(2) 0.0250(9) Uani 1 1 d . . . 
H7A H 1.0782 0.3933 0.7770 0.030 Uiso 1 1 calc R . . 
H7B H 1.1927 0.3156 0.7925 0.030 Uiso 1 1 calc R . . 
C8 C 1.1467(4) 0.3658(5) 0.6338(3) 0.0224(9) Uani 1 1 d . . . 
C9 C 1.1436(4) 0.5223(5) 0.6549(3) 0.0356(11) Uani 1 1 d . . . 
H9A H 1.0678 0.5517 0.6433 0.053 Uiso 1 1 calc R . . 
H9B H 1.1765 0.5776 0.6214 0.053 Uiso 1 1 calc R . . 
H9C H 1.1844 0.5370 0.7135 0.053 Uiso 1 1 calc R . . 
C10 C 1.2640(4) 0.3061(6) 0.6592(3) 0.0302(10) Uani 1 1 d . . . 
H10A H 1.3022 0.3261 0.7176 0.045 Uiso 1 1 calc R . . 
H10B H 1.3032 0.3499 0.6257 0.045 Uiso 1 1 calc R . . 
H10C H 1.2608 0.2047 0.6503 0.045 Uiso 1 1 calc R . . 
C11 C 1.0843(4) 0.3380(6) 0.5414(3) 0.0295(10) Uani 1 1 d . . . 
H11A H 1.0847 0.2374 0.5303 0.044 Uiso 1 1 calc R . . 
H11B H 1.1199 0.3884 0.5077 0.044 Uiso 1 1 calc R . . 
H11C H 1.0089 0.3705 0.5276 0.044 Uiso 1 1 calc R . . 
C12 C 0.8728(4) -0.1310(5) 0.7360(3) 0.0285(10) Uani 1 1 d . . . 
H12A H 0.9094 -0.2208 0.7334 0.034 Uiso 1 1 calc R . . 
H12B H 0.8145 -0.1491 0.7598 0.034 Uiso 1 1 calc R . . 
C13 C 0.7096(4) -0.1144(5) 0.6053(3) 0.0283(10) Uani 1 1 d . . . 
C14 C 0.6330(4) -0.0395(7) 0.6453(4) 0.0432(13) Uani 1 1 d . . . 
H14A H 0.6463 -0.0767 0.7009 0.065 Uiso 1 1 calc R . . 
H14B H 0.5568 -0.0562 0.6116 0.065 Uiso 1 1 calc R . . 
H14C H 0.6478 0.0613 0.6485 0.065 Uiso 1 1 calc R . . 
C15 C 0.6987(5) -0.2732(6) 0.6051(4) 0.0487(15) Uani 1 1 d . . . 
H15A H 0.7534 -0.3154 0.5846 0.073 Uiso 1 1 calc R . . 
H15B H 0.6256 -0.3002 0.5693 0.073 Uiso 1 1 calc R . . 
H15C H 0.7102 -0.3060 0.6614 0.073 Uiso 1 1 calc R . . 
C16 C 0.6902(4) -0.0550(6) 0.5175(3) 0.0379(12) Uani 1 1 d . . . 
H16A H 0.6964 0.0473 0.5202 0.057 Uiso 1 1 calc R . . 
H16B H 0.6172 -0.0814 0.4812 0.057 Uiso 1 1 calc R . . 
H16C H 0.7449 -0.0934 0.4956 0.057 Uiso 1 1 calc R . . 
 
loop_ 
 _atom_site_aniso_label 
 _atom_site_aniso_U_11 
 _atom_site_aniso_U_22 
 _atom_site_aniso_U_33 
 _atom_site_aniso_U_23 
 _atom_site_aniso_U_13 
 _atom_site_aniso_U_12 
Bi1 0.01604(10) 0.01958(11) 0.01373(9) -0.00013(5) 0.00455(6) -0.00126(5) 
Cl1 0.0365(6) 0.0377(7) 0.0282(5) 0.0005(5) 0.0097(5) 0.0154(5) 
Cl2 0.0300(6) 0.0305(6) 0.0204(5) -0.0014(4) 0.0041(4) 0.0095(5) 
O1 0.0259(15) 0.0248(16) 0.0160(13) -0.0030(11) 0.0091(12) -0.0088(12) 
O2 0.0220(16) 0.0335(17) 0.0206(14) 0.0056(13) 0.0060(12) -0.0082(13) 
C1 0.022(2) 0.025(2) 0.0095(16) -0.0023(15) 0.0064(15) 0.0028(16) 
C2 0.020(2) 0.024(2) 0.0173(18) -0.0038(16) 0.0064(16) 0.0020(16) 
C3 0.024(2) 0.031(2) 0.0162(18) -0.0049(18) 0.0045(16) 0.0037(19) 
C4 0.026(2) 0.037(3) 0.0144(18) 0.0013(18) 0.0085(16) 0.0101(19) 
C5 0.027(2) 0.031(2) 0.0194(19) 0.0078(18) 0.0120(17) 0.0086(19) 
C6 0.020(2) 0.022(2) 0.0202(19) 0.0018(16) 0.0074(16) 0.0041(16) 
C7 0.027(2) 0.031(3) 0.0159(18) -0.0063(17) 0.0053(17) -0.0075(18) 
C8 0.023(2) 0.023(2) 0.022(2) -0.0006(16) 0.0081(17) -0.0055(17) 
C9 0.042(3) 0.025(3) 0.037(3) 0.003(2) 0.010(2) -0.006(2) 
C10 0.022(2) 0.041(3) 0.028(2) 0.001(2) 0.0093(18) -0.0023(19) 
C11 0.033(2) 0.036(3) 0.0185(19) 0.0045(19) 0.0075(18) -0.007(2) 
C12 0.026(2) 0.033(3) 0.025(2) 0.0081(18) 0.0068(19) -0.0059(18) 
C13 0.020(2) 0.035(3) 0.027(2) 0.0007(18) 0.0041(19) -0.0103(18) 
C14 0.027(3) 0.060(4) 0.046(3) 0.006(3) 0.017(2) 0.009(2) 
C15 0.049(3) 0.041(3) 0.050(3) -0.004(3) 0.010(3) -0.023(3) 
C16 0.032(3) 0.051(3) 0.025(2) -0.004(2) 0.002(2) -0.013(2) 
 
_geom_special_details 
; 
 All esds (except the esd in the dihedral angle between two l.s. planes) 
 are estimated using the full covariance matrix.  The cell esds are taken 
 into account individually in the estimation of esds in distances, angles 
 and torsion angles; correlations between esds in cell parameters are only 
 used when they are defined by crystal symmetry.  An approximate (isotropic) 
 treatment of cell esds is used for estimating esds involving l.s. planes. 
; 
 
loop_ 
 _geom_bond_atom_site_label_1 
 _geom_bond_atom_site_label_2 
 _geom_bond_distance 
 _geom_bond_site_symmetry_2 
 _geom_bond_publ_flag 
Bi1 C1 2.199(4) . ? 
Bi1 O1 2.376(3) . ? 
Bi1 O2 2.459(3) . ? 
Bi1 Cl1 2.6863(11) . ? 
Bi1 Cl2 2.6872(11) . ? 
O1 C7 1.446(5) . ? 
O1 C8 1.484(5) . ? 
O2 C12 1.443(5) . ? 
O2 C13 1.475(5) . ? 
C1 C6 1.389(6) . ? 
C1 C2 1.394(6) . ? 
C2 C3 1.400(5) . ? 
C2 C7 1.495(6) . ? 
C3 C4 1.382(7) . ? 
C3 H3 0.9300 . ? 
C4 C5 1.382(7) . ? 
C4 H4 0.9300 . ? 
C5 C6 1.399(5) . ? 
C5 H5 0.9300 . ? 
C6 C12 1.506(6) . ? 
C7 H7A 0.9700 . ? 
C7 H7B 0.9700 . ? 
C8 C9 1.510(6) . ? 
C8 C11 1.516(6) . ? 
C8 C10 1.519(6) . ? 
C9 H9A 0.9600 . ? 
C9 H9B 0.9600 . ? 
C9 H9C 0.9600 . ? 
C10 H10A 0.9600 . ? 
C10 H10B 0.9600 . ? 
C10 H10C 0.9600 . ? 
C11 H11A 0.9600 . ? 
C11 H11B 0.9600 . ? 
C11 H11C 0.9600 . ? 
C12 H12A 0.9700 . ? 
C12 H12B 0.9700 . ? 
C13 C15 1.492(7) . ? 
C13 C16 1.523(7) . ? 
C13 C14 1.529(7) . ? 
C14 H14A 0.9600 . ? 
C14 H14B 0.9600 . ? 
C14 H14C 0.9600 . ? 
C15 H15A 0.9600 . ? 
C15 H15B 0.9600 . ? 
C15 H15C 0.9600 . ? 
C16 H16A 0.9600 . ? 
C16 H16B 0.9600 . ? 
C16 H16C 0.9600 . ? 
 
loop_ 
 _geom_angle_atom_site_label_1 
 _geom_angle_atom_site_label_2 
 _geom_angle_atom_site_label_3 
 _geom_angle 
 _geom_angle_site_symmetry_1 
 _geom_angle_site_symmetry_3 
 _geom_angle_publ_flag 
C1 Bi1 O1 72.37(13) . . ? 
C1 Bi1 O2 71.26(13) . . ? 
O1 Bi1 O2 143.55(9) . . ? 
C1 Bi1 Cl1 91.54(11) . . ? 
O1 Bi1 Cl1 85.30(8) . . ? 
O2 Bi1 Cl1 93.33(9) . . ? 
C1 Bi1 Cl2 89.49(11) . . ? 
O1 Bi1 Cl2 87.88(8) . . ? 
O2 Bi1 Cl2 94.08(8) . . ? 
Cl1 Bi1 Cl2 172.45(4) . . ? 
C7 O1 C8 116.3(3) . . ? 
C7 O1 Bi1 116.0(2) . . ? 
C8 O1 Bi1 127.7(2) . . ? 
C12 O2 C13 116.3(3) . . ? 
C12 O2 Bi1 114.1(2) . . ? 
C13 O2 Bi1 128.9(2) . . ? 
C6 C1 C2 121.0(4) . . ? 
C6 C1 Bi1 120.2(3) . . ? 
C2 C1 Bi1 118.8(3) . . ? 
C1 C2 C3 118.8(4) . . ? 
C1 C2 C7 120.6(4) . . ? 
C3 C2 C7 120.6(4) . . ? 
C4 C3 C2 120.1(4) . . ? 
C4 C3 H3 120.0 . . ? 
C2 C3 H3 120.0 . . ? 
C3 C4 C5 121.0(4) . . ? 
C3 C4 H4 119.5 . . ? 
C5 C4 H4 119.5 . . ? 
C4 C5 C6 119.5(4) . . ? 
C4 C5 H5 120.2 . . ? 
C6 C5 H5 120.2 . . ? 
C1 C6 C5 119.5(4) . . ? 
C1 C6 C12 120.7(4) . . ? 
C5 C6 C12 119.8(4) . . ? 
O1 C7 C2 109.0(3) . . ? 
O1 C7 H7A 109.9 . . ? 
C2 C7 H7A 109.9 . . ? 
O1 C7 H7B 109.9 . . ? 
C2 C7 H7B 109.9 . . ? 
H7A C7 H7B 108.3 . . ? 
O1 C8 C9 109.7(4) . . ? 
O1 C8 C11 103.6(3) . . ? 
C9 C8 C11 111.3(4) . . ? 
O1 C8 C10 107.9(3) . . ? 
C9 C8 C10 113.0(4) . . ? 
C11 C8 C10 110.9(4) . . ? 
C8 C9 H9A 109.5 . . ? 
C8 C9 H9B 109.5 . . ? 
H9A C9 H9B 109.5 . . ? 
C8 C9 H9C 109.5 . . ? 
H9A C9 H9C 109.5 . . ? 
H9B C9 H9C 109.5 . . ? 
C8 C10 H10A 109.5 . . ? 
C8 C10 H10B 109.5 . . ? 
H10A C10 H10B 109.5 . . ? 
C8 C10 H10C 109.5 . . ? 
H10A C10 H10C 109.5 . . ? 
H10B C10 H10C 109.5 . . ? 
C8 C11 H11A 109.5 . . ? 
C8 C11 H11B 109.5 . . ? 
H11A C11 H11B 109.5 . . ? 
C8 C11 H11C 109.5 . . ? 
H11A C11 H11C 109.5 . . ? 
H11B C11 H11C 109.5 . . ? 
O2 C12 C6 109.4(3) . . ? 
O2 C12 H12A 109.8 . . ? 
C6 C12 H12A 109.8 . . ? 
O2 C12 H12B 109.8 . . ? 
C6 C12 H12B 109.8 . . ? 
H12A C12 H12B 108.2 . . ? 
O2 C13 C15 110.0(4) . . ? 
O2 C13 C16 103.6(3) . . ? 
C15 C13 C16 112.1(4) . . ? 
O2 C13 C14 108.1(4) . . ? 
C15 C13 C14 112.7(4) . . ? 
C16 C13 C14 109.9(4) . . ? 
C13 C14 H14A 109.5 . . ? 
C13 C14 H14B 109.5 . . ? 
H14A C14 H14B 109.5 . . ? 
C13 C14 H14C 109.5 . . ? 
H14A C14 H14C 109.5 . . ? 
H14B C14 H14C 109.5 . . ? 
C13 C15 H15A 109.5 . . ? 
C13 C15 H15B 109.5 . . ? 
H15A C15 H15B 109.5 . . ? 
C13 C15 H15C 109.5 . . ? 
H15A C15 H15C 109.5 . . ? 
H15B C15 H15C 109.5 . . ? 
C13 C16 H16A 109.5 . . ? 
C13 C16 H16B 109.5 . . ? 
H16A C16 H16B 109.5 . . ? 
C13 C16 H16C 109.5 . . ? 
H16A C16 H16C 109.5 . . ? 
H16B C16 H16C 109.5 . . ? 
 
_diffrn_measured_fraction_theta_max    1.000 
_diffrn_reflns_theta_full              27.48 
_diffrn_measured_fraction_theta_full   1.000 
_refine_diff_density_max    2.185 
_refine_diff_density_min   -1.779 
_refine_diff_density_rms    0.157 
#===END
 
data_7-biocomi2-ruzic 
 
_audit_creation_method            SHELXL-97 
_chemical_name_systematic 
; 
 ? 
; 
_chemical_name_common             ? 
_chemical_melting_point           ? 
_chemical_formula_moiety          'C10 H13 Bi I2 O2' 
_chemical_formula_sum 
 'C10 H13 Bi I2 O2' 
_chemical_formula_weight          627.98 
_chemical_compound_source         'synthesized by the authors'
 
loop_ 
 _atom_type_symbol 
 _atom_type_description 
 _atom_type_scat_dispersion_real 
 _atom_type_scat_dispersion_imag 
 _atom_type_scat_source 
 'C'  'C'   0.0033   0.0016 
 'International Tables Vol C Tables 4.2.6.8 and 6.1.1.4' 
 'H'  'H'   0.0000   0.0000 
 'International Tables Vol C Tables 4.2.6.8 and 6.1.1.4' 
 'O'  'O'   0.0106   0.0060 
 'International Tables Vol C Tables 4.2.6.8 and 6.1.1.4' 
 'I'  'I'  -0.4742   1.8119 
 'International Tables Vol C Tables 4.2.6.8 and 6.1.1.4' 
 'Bi'  'Bi'  -4.1077  10.2566 
 'International Tables Vol C Tables 4.2.6.8 and 6.1.1.4' 
 
_symmetry_cell_setting            monoclinic 
_symmetry_space_group_name_H-M    'C 2/c' 
_symmetry_space_group_name_Hall   '-C 2yc'
 
loop_ 
 _symmetry_equiv_pos_as_xyz 
 'x, y, z' 
 '-x, y, -z+1/2' 
 'x+1/2, y+1/2, z' 
 '-x+1/2, y+1/2, -z+1/2' 
 '-x, -y, -z' 
 'x, -y, z-1/2' 
 '-x+1/2, -y+1/2, -z' 
 'x+1/2, -y+1/2, z-1/2' 
 
_cell_length_a                    15.6080(5) 
_cell_length_b                    11.9450(3) 
_cell_length_c                    8.5850(3) 
_cell_angle_alpha                 90.00 
_cell_angle_beta                  117.1211(16) 
_cell_angle_gamma                 90.00 
_cell_volume                      1424.58(8) 
_cell_formula_units_Z             4 
_cell_measurement_temperature     150(2) 
_cell_measurement_reflns_used     7887 
_cell_measurement_theta_min       1 
_cell_measurement_theta_max       27.5 
 
_exptl_crystal_description        prism 
_exptl_crystal_colour             yellow 
_exptl_crystal_size_max           0.25 
_exptl_crystal_size_mid           0.15 
_exptl_crystal_size_min           0.1 
_exptl_crystal_density_meas       ? 
_exptl_crystal_density_diffrn     2.928 
_exptl_crystal_density_method     'not measured' 
_exptl_crystal_F_000              1112 
_exptl_absorpt_coefficient_mu     16.692 
_exptl_absorpt_correction_type    gaussian 
_exptl_absorpt_correction_T_min   0.048 
_exptl_absorpt_correction_T_max   0.227 
_exptl_absorpt_process_details    '(Coppens, 1970)' 
 
_exptl_special_details 
; 
 ? 
; 
 
_diffrn_ambient_temperature       150(2) 
_diffrn_radiation_wavelength      0.71073 
_diffrn_radiation_type            MoK\a 
_diffrn_radiation_source          'fine-focus sealed tube' 
_diffrn_radiation_monochromator   graphite 
_diffrn_measurement_device_type   'Nonius KappaCCD area detector' 
_diffrn_measurement_method        '\f and \w scans to fill the Ewald sphere' 
_diffrn_detector_area_resol_mean  9.091 
_diffrn_standards_number          0 
_diffrn_standards_interval_count  ? 
_diffrn_standards_interval_time   ? 
_diffrn_standards_decay_%         ? 
_diffrn_reflns_number             9598 
_diffrn_reflns_av_R_equivalents   0.0852 
_diffrn_reflns_av_sigmaI/netI     0.0397 
_diffrn_reflns_limit_h_min        -19 
_diffrn_reflns_limit_h_max        20 
_diffrn_reflns_limit_k_min        -15 
_diffrn_reflns_limit_k_max        15 
_diffrn_reflns_limit_l_min        -11 
_diffrn_reflns_limit_l_max        10 
_diffrn_reflns_theta_min          2.25 
_diffrn_reflns_theta_max          27.47 
_reflns_number_total              1637 
_reflns_number_gt                 1589 
_reflns_threshold_expression      I>2\s(I) 
 
_computing_data_collection         
 'COLLECT (Hooft, 1998) and DENZO (Otwinowski & Minor, 1997)'
_computing_cell_refinement        'COLLECT and DENZO' 
_computing_data_reduction         'COLLECT and DENZO' 
_computing_structure_solution     'SIR92 (Altomare et al., 1994)' 
_computing_structure_refinement   'SHELXL-97 (Sheldrick, 1997)' 
_computing_molecular_graphics     ? 
_computing_publication_material   ? 
 
_refine_special_details 
; 
 Refinement of F^2^ against ALL reflections.  The weighted R-factor wR and 
 goodness of fit S are based on F^2^, conventional R-factors R are based 
 on F, with F set to zero for negative F^2^. The threshold expression of 
 F^2^ > 2sigma(F^2^) is used only for calculating R-factors(gt) etc. and is 
 not relevant to the choice of reflections for refinement.  R-factors based 
 on F^2^ are statistically about twice as large as those based on F, and R- 
 factors based on ALL data will be even larger. 
; 
 
_refine_ls_structure_factor_coef  Fsqd  
_refine_ls_matrix_type            full 
_refine_ls_weighting_scheme       calc  
_refine_ls_weighting_details 
 'calc w=1/[\s^2^(Fo^2^)+(0.0305P)^2^+5.7101P] where P=(Fo^2^+2Fc^2^)/3' 
_atom_sites_solution_primary      direct 
_atom_sites_solution_secondary    difmap 
_atom_sites_solution_hydrogens    geom 
_refine_ls_hydrogen_treatment     constr 
_refine_ls_extinction_method      SHELXL 
_refine_ls_extinction_coef        0.00137(11) 
_refine_ls_extinction_expression 
 'Fc^*^=kFc[1+0.001xFc^2^\l^3^/sin(2\q)]^-1/4^' 
_refine_ls_number_reflns          1637 
_refine_ls_number_parameters      72 
_refine_ls_number_restraints      0 
_refine_ls_R_factor_all           0.0265 
_refine_ls_R_factor_gt            0.0256 
_refine_ls_wR_factor_ref          0.0678 
_refine_ls_wR_factor_gt           0.0672 
_refine_ls_goodness_of_fit_ref    1.122 
_refine_ls_restrained_S_all       1.122 
_refine_ls_shift/su_max           0.001 
_refine_ls_shift/su_mean          0.000 
 
loop_ 
 _atom_site_label 
 _atom_site_type_symbol 
 _atom_site_fract_x 
 _atom_site_fract_y 
 _atom_site_fract_z 
 _atom_site_U_iso_or_equiv 
 _atom_site_adp_type 
 _atom_site_occupancy 
 _atom_site_symmetry_multiplicity 
 _atom_site_calc_flag 
 _atom_site_refinement_flags 
 _atom_site_disorder_assembly 
 _atom_site_disorder_group 
Bi1 Bi 0.0000 0.363007(18) 0.2500 0.02121(12) Uani 1 2 d S . . 
I1 I -0.09439(2) 0.35153(3) 0.48988(4) 0.02950(13) Uani 1 1 d . . . 
C1 C 0.0000 0.1773(5) 0.2500 0.0234(12) Uani 1 2 d S . . 
C2 C 0.0687(4) 0.1199(4) 0.3936(7) 0.0264(10) Uani 1 1 d . . . 
C3 C 0.0689(4) 0.0037(4) 0.3927(7) 0.0337(11) Uani 1 1 d . . . 
H3 H 0.1150 -0.0353 0.4877 0.040 Uiso 1 1 calc R . . 
C4 C 0.0000 -0.0547(6) 0.2500 0.0328(15) Uani 1 2 d S . . 
H4 H 0.0000 -0.1326 0.2500 0.039 Uiso 1 2 calc SR . . 
C7 C 0.1382(3) 0.1843(4) 0.5516(6) 0.0290(10) Uani 1 1 d . . . 
H7A H 0.1147 0.1872 0.6383 0.035 Uiso 1 1 calc R . . 
H7B H 0.2004 0.1473 0.6035 0.035 Uiso 1 1 calc R . . 
C8 C 0.2096(4) 0.3632(4) 0.6504(8) 0.0340(13) Uani 1 1 d . . . 
H8A H 0.1799 0.3710 0.7262 0.051 Uiso 1 1 calc R . . 
H8B H 0.2186 0.4359 0.6124 0.051 Uiso 1 1 calc R . . 
H8C H 0.2708 0.3270 0.7126 0.051 Uiso 1 1 calc R . . 
O1 O 0.1482(2) 0.2964(3) 0.4993(4) 0.0268(7) Uani 1 1 d . . . 
 
loop_ 
 _atom_site_aniso_label 
 _atom_site_aniso_U_11 
 _atom_site_aniso_U_22 
 _atom_site_aniso_U_33 
 _atom_site_aniso_U_23 
 _atom_site_aniso_U_13 
 _atom_site_aniso_U_12 
Bi1 0.01890(16) 0.02159(16) 0.01961(16) 0.000 0.00570(11) 0.000 
I1 0.0300(2) 0.0321(2) 0.0256(2) -0.00273(11) 0.01199(16) 0.00047(11) 
C1 0.022(3) 0.022(3) 0.028(3) 0.000 0.013(3) 0.000 
C2 0.026(2) 0.027(2) 0.032(2) 0.0030(19) 0.018(2) 0.0019(18) 
C3 0.038(3) 0.026(2) 0.043(3) 0.011(2) 0.024(2) 0.009(2) 
C4 0.041(4) 0.026(3) 0.043(4) 0.000 0.029(3) 0.000 
C7 0.026(2) 0.029(3) 0.029(2) 0.0077(19) 0.0098(19) 0.0036(19) 
C8 0.029(3) 0.033(3) 0.029(3) -0.0012(18) 0.003(2) 0.0023(18) 
O1 0.0223(15) 0.0285(16) 0.0243(15) 0.0041(13) 0.0062(13) 0.0007(13) 
 
_geom_special_details 
; 
 All esds (except the esd in the dihedral angle between two l.s. planes) 
 are estimated using the full covariance matrix.  The cell esds are taken 
 into account individually in the estimation of esds in distances, angles 
 and torsion angles; correlations between esds in cell parameters are only 
 used when they are defined by crystal symmetry.  An approximate (isotropic) 
 treatment of cell esds is used for estimating esds involving l.s. planes. 
; 
 
loop_ 
 _geom_bond_atom_site_label_1 
 _geom_bond_atom_site_label_2 
 _geom_bond_distance 
 _geom_bond_site_symmetry_2 
 _geom_bond_publ_flag 
Bi1 C1 2.219(6) . ? 
Bi1 O1 2.460(3) 2 ? 
Bi1 O1 2.460(3) . ? 
Bi1 I1 3.0326(4) . ? 
Bi1 I1 3.0327(4) 2 ? 
C1 C2 1.391(6) 2 ? 
C1 C2 1.391(6) . ? 
C2 C3 1.388(7) . ? 
C2 C7 1.506(7) . ? 
C3 C4 1.394(7) . ? 
C3 H3 0.9300 . ? 
C4 C3 1.394(7) 2 ? 
C4 H4 0.9300 . ? 
C7 O1 1.442(6) . ? 
C7 H7A 0.9700 . ? 
C7 H7B 0.9700 . ? 
C8 O1 1.451(6) . ? 
C8 H8A 0.9600 . ? 
C8 H8B 0.9600 . ? 
C8 H8C 0.9600 . ? 
 
loop_ 
 _geom_angle_atom_site_label_1 
 _geom_angle_atom_site_label_2 
 _geom_angle_atom_site_label_3 
 _geom_angle 
 _geom_angle_site_symmetry_1 
 _geom_angle_site_symmetry_3 
 _geom_angle_publ_flag 
C1 Bi1 O1 71.12(8) . 2 ? 
C1 Bi1 O1 71.12(8) . . ? 
O1 Bi1 O1 142.23(16) 2 . ? 
C1 Bi1 I1 87.409(7) . . ? 
O1 Bi1 I1 91.20(8) 2 . ? 
O1 Bi1 I1 87.12(8) . . ? 
C1 Bi1 I1 87.410(7) . 2 ? 
O1 Bi1 I1 87.12(8) 2 2 ? 
O1 Bi1 I1 91.20(8) . 2 ? 
I1 Bi1 I1 174.820(14) . 2 ? 
C2 C1 C2 120.9(6) 2 . ? 
C2 C1 Bi1 119.5(3) 2 . ? 
C2 C1 Bi1 119.5(3) . . ? 
C3 C2 C1 119.4(5) . . ? 
C3 C2 C7 120.9(4) . . ? 
C1 C2 C7 119.6(4) . . ? 
C2 C3 C4 120.2(5) . . ? 
C2 C3 H3 119.9 . . ? 
C4 C3 H3 119.9 . . ? 
C3 C4 C3 119.9(7) . 2 ? 
C3 C4 H4 120.0 . . ? 
C3 C4 H4 120.0 2 . ? 
O1 C7 C2 109.3(4) . . ? 
O1 C7 H7A 109.8 . . ? 
C2 C7 H7A 109.8 . . ? 
O1 C7 H7B 109.8 . . ? 
C2 C7 H7B 109.8 . . ? 
H7A C7 H7B 108.3 . . ? 
O1 C8 H8A 109.5 . . ? 
O1 C8 H8B 109.5 . . ? 
H8A C8 H8B 109.5 . . ? 
O1 C8 H8C 109.5 . . ? 
H8A C8 H8C 109.5 . . ? 
H8B C8 H8C 109.5 . . ? 
C7 O1 C8 110.7(3) . . ? 
C7 O1 Bi1 112.3(2) . . ? 
C8 O1 Bi1 125.1(3) . . ? 
 
_diffrn_measured_fraction_theta_max    0.999 
_diffrn_reflns_theta_full              27.47 
_diffrn_measured_fraction_theta_full   0.999 
_refine_diff_density_max    1.338 
_refine_diff_density_min   -1.236 
_refine_diff_density_rms    0.224 
#===END

 
data_8-ocotbii2-ruzic 
 
_audit_creation_method            SHELXL-97 
_chemical_name_systematic 
; 
 ? 
; 
_chemical_name_common             ? 
_chemical_melting_point           ? 
_chemical_formula_moiety           'C16 H25 Bi I2 O2' 
_chemical_formula_sum 
 'C16 H25 Bi I2 O2' 
_chemical_formula_weight          712.14 
_chemical_compound_source         'synthesized by the authors'
 
loop_ 
 _atom_type_symbol 
 _atom_type_description 
 _atom_type_scat_dispersion_real 
 _atom_type_scat_dispersion_imag 
 _atom_type_scat_source 
 'C'  'C'   0.0033   0.0016 
 'International Tables Vol C Tables 4.2.6.8 and 6.1.1.4' 
 'H'  'H'   0.0000   0.0000 
 'International Tables Vol C Tables 4.2.6.8 and 6.1.1.4' 
 'O'  'O'   0.0106   0.0060 
 'International Tables Vol C Tables 4.2.6.8 and 6.1.1.4' 
 'I'  'I'  -0.4742   1.8119 
 'International Tables Vol C Tables 4.2.6.8 and 6.1.1.4' 
 'Bi'  'Bi'  -4.1077  10.2566 
 'International Tables Vol C Tables 4.2.6.8 and 6.1.1.4' 
 
_symmetry_cell_setting            monoclinic 
_symmetry_space_group_name_H-M    'P 21/c' 
_symmetry_space_group_name_Hall   '-P 2ybc'
 
loop_ 
 _symmetry_equiv_pos_as_xyz 
 'x, y, z' 
 '-x, y+1/2, -z+1/2' 
 '-x, -y, -z' 
 'x, -y-1/2, z-1/2' 
 
_cell_length_a                    8.5780(2) 
_cell_length_b                    23.4510(3) 
_cell_length_c                    9.9950(2) 
_cell_angle_alpha                 90.00 
_cell_angle_beta                  94.5500(10) 
_cell_angle_gamma                 90.00 
_cell_volume                      2004.28(7) 
_cell_formula_units_Z             4 
_cell_measurement_temperature     150(2) 
_cell_measurement_reflns_used     31402 
_cell_measurement_theta_min       1 
_cell_measurement_theta_max       27.5 
 
_exptl_crystal_description        prism 
_exptl_crystal_colour             yellow 
_exptl_crystal_size_max           0.22 
_exptl_crystal_size_mid           0.12 
_exptl_crystal_size_min           0.075 
_exptl_crystal_density_meas       ? 
_exptl_crystal_density_diffrn     2.360 
_exptl_crystal_density_method     'not measured' 
_exptl_crystal_F_000              1304 
_exptl_absorpt_coefficient_mu     11.879 
_exptl_absorpt_correction_type    gaussian 
_exptl_absorpt_correction_T_min   0.226 
_exptl_absorpt_correction_T_max   0.365 
_exptl_absorpt_process_details    '(Coppens, 1970)' 
 
_exptl_special_details 
; 
 ? 
; 
 
_diffrn_ambient_temperature       150(2) 
_diffrn_radiation_wavelength      0.71073 
_diffrn_radiation_type            MoK\a 
_diffrn_radiation_source          'fine-focus sealed tube' 
_diffrn_radiation_monochromator   graphite 
_diffrn_measurement_device_type   'Nonius KappaCCD area detector' 
_diffrn_measurement_method        '\f and \w scans to fill the Ewald sphere' 
_diffrn_detector_area_resol_mean  9.091 
_diffrn_standards_number          0 
_diffrn_standards_interval_count  ? 
_diffrn_standards_interval_time   ? 
_diffrn_standards_decay_%         ? 
_diffrn_reflns_number             30754 
_diffrn_reflns_av_R_equivalents   0.0525 
_diffrn_reflns_av_sigmaI/netI     0.0326 
_diffrn_reflns_limit_h_min        -11 
_diffrn_reflns_limit_h_max        11 
_diffrn_reflns_limit_k_min        -30 
_diffrn_reflns_limit_k_max        30 
_diffrn_reflns_limit_l_min        -12 
_diffrn_reflns_limit_l_max        12 
_diffrn_reflns_theta_min          1.74 
_diffrn_reflns_theta_max          27.46 
_reflns_number_total              4582 
_reflns_number_gt                 3888 
_reflns_threshold_expression      I>2\s(I) 
 
_computing_data_collection         
 'COLLECT (Hooft, 1998) and DENZO (Otwinowski & Minor, 1997)'
_computing_cell_refinement        'COLLECT and DENZO' 
_computing_data_reduction         'COLLECT and DENZO' 
_computing_structure_solution     'SIR92 (Altomare et al., 1994)' 
_computing_structure_refinement   'SHELXL-97 (Sheldrick, 1997)' 
_computing_molecular_graphics     ? 
_computing_publication_material   ? 
 
_refine_special_details 
; 
 Refinement of F^2^ against ALL reflections.  The weighted R-factor wR and 
 goodness of fit S are based on F^2^, conventional R-factors R are based 
 on F, with F set to zero for negative F^2^. The threshold expression of 
 F^2^ > 2sigma(F^2^) is used only for calculating R-factors(gt) etc. and is 
 not relevant to the choice of reflections for refinement.  R-factors based 
 on F^2^ are statistically about twice as large as those based on F, and R- 
 factors based on ALL data will be even larger. 
; 
 
_refine_ls_structure_factor_coef  Fsqd  
_refine_ls_matrix_type            full 
_refine_ls_weighting_scheme       calc  
_refine_ls_weighting_details 
 'calc w=1/[\s^2^(Fo^2^)+(0.0301P)^2^+5.5227P] where P=(Fo^2^+2Fc^2^)/3' 
_atom_sites_solution_primary      direct 
_atom_sites_solution_secondary    difmap 
_atom_sites_solution_hydrogens    geom 
_refine_ls_hydrogen_treatment     constr 
_refine_ls_extinction_method      SHELXL 
_refine_ls_extinction_coef        0.00056(6) 
_refine_ls_extinction_expression 
 'Fc^*^=kFc[1+0.001xFc^2^\l^3^/sin(2\q)]^-1/4^' 
_refine_ls_number_reflns          4582 
_refine_ls_number_parameters      197 
_refine_ls_number_restraints      0 
_refine_ls_R_factor_all           0.0414 
_refine_ls_R_factor_gt            0.0297 
_refine_ls_wR_factor_ref          0.0688 
_refine_ls_wR_factor_gt           0.0636 
_refine_ls_goodness_of_fit_ref    1.070 
_refine_ls_restrained_S_all       1.070 
_refine_ls_shift/su_max           0.002 
_refine_ls_shift/su_mean          0.000 
 
loop_ 
 _atom_site_label 
 _atom_site_type_symbol 
 _atom_site_fract_x 
 _atom_site_fract_y 
 _atom_site_fract_z 
 _atom_site_U_iso_or_equiv 
 _atom_site_adp_type 
 _atom_site_occupancy 
 _atom_site_symmetry_multiplicity 
 _atom_site_calc_flag 
 _atom_site_refinement_flags 
 _atom_site_disorder_assembly 
 _atom_site_disorder_group 
Bi1 Bi 0.49718(2) 0.101431(8) 0.856486(19) 0.01961(8) Uani 1 1 d . . . 
I1 I 0.26508(4) 0.131680(15) 0.61257(4) 0.02960(10) Uani 1 1 d . . . 
I2 I 0.70598(4) 0.063199(16) 1.09590(4) 0.03106(11) Uani 1 1 d . . . 
O1 O 0.7059(4) 0.09250(14) 0.7070(4) 0.0227(8) Uani 1 1 d . . . 
O2 O 0.3626(4) 0.16764(15) 0.9924(4) 0.0241(8) Uani 1 1 d . . . 
C1 C 0.6155(6) 0.1847(2) 0.8475(5) 0.0196(11) Uani 1 1 d . . . 
C2 C 0.7389(6) 0.1909(2) 0.7669(5) 0.0235(11) Uani 1 1 d . . . 
C3 C 0.8016(7) 0.2451(2) 0.7517(6) 0.0306(13) Uani 1 1 d . . . 
H3 H 0.8822 0.2503 0.6960 0.037 Uiso 1 1 calc R . . 
C4 C 0.7444(7) 0.2915(2) 0.8193(6) 0.0306(13) Uani 1 1 d . . . 
H4 H 0.7876 0.3275 0.8090 0.037 Uiso 1 1 calc R . . 
C5 C 0.6232(6) 0.2845(2) 0.9019(6) 0.0268(12) Uani 1 1 d . . . 
H5 H 0.5850 0.3158 0.9463 0.032 Uiso 1 1 calc R . . 
C6 C 0.5590(6) 0.2308(2) 0.9183(5) 0.0245(11) Uani 1 1 d . . . 
C7 C 0.8061(7) 0.1407(2) 0.6998(6) 0.0269(12) Uani 1 1 d . . . 
H7A H 0.8186 0.1497 0.6065 0.032 Uiso 1 1 calc R . . 
H7B H 0.9084 0.1318 0.7432 0.032 Uiso 1 1 calc R . . 
C8 C 0.7581(6) 0.0386(2) 0.6459(5) 0.0249(12) Uani 1 1 d . . . 
C9 C 0.6250(7) -0.0025(2) 0.6655(6) 0.0276(12) Uani 1 1 d . . . 
H9A H 0.6217 -0.0107 0.7593 0.041 Uiso 1 1 calc R . . 
H9B H 0.6412 -0.0372 0.6177 0.041 Uiso 1 1 calc R . . 
H9C H 0.5278 0.0145 0.6319 0.041 Uiso 1 1 calc R . . 
C10 C 0.9100(7) 0.0186(3) 0.7193(7) 0.0357(14) Uani 1 1 d . . . 
H10A H 0.9925 0.0447 0.7020 0.054 Uiso 1 1 calc R . . 
H10B H 0.9354 -0.0187 0.6882 0.054 Uiso 1 1 calc R . . 
H10C H 0.8984 0.0173 0.8139 0.054 Uiso 1 1 calc R . . 
C11 C 0.7754(8) 0.0490(3) 0.4970(6) 0.0384(15) Uani 1 1 d . . . 
H11A H 0.6814 0.0660 0.4566 0.058 Uiso 1 1 calc R . . 
H11B H 0.7934 0.0133 0.4537 0.058 Uiso 1 1 calc R . . 
H11C H 0.8622 0.0740 0.4871 0.058 Uiso 1 1 calc R . . 
C12 C 0.4315(7) 0.2229(2) 1.0108(6) 0.0337(14) Uani 1 1 d . . . 
H12A H 0.4742 0.2271 1.1031 0.040 Uiso 1 1 calc R . . 
H12B H 0.3521 0.2520 0.9928 0.040 Uiso 1 1 calc R . . 
C13 C 0.2119(6) 0.1580(2) 1.0540(6) 0.0260(12) Uani 1 1 d . . . 
C14 C 0.0897(7) 0.1972(3) 0.9883(6) 0.0364(14) Uani 1 1 d . . . 
H14A H 0.1051 0.2350 1.0236 0.055 Uiso 1 1 calc R . . 
H14B H -0.0124 0.1838 1.0063 0.055 Uiso 1 1 calc R . . 
H14C H 0.0984 0.1977 0.8931 0.055 Uiso 1 1 calc R . . 
C15 C 0.2361(9) 0.1680(3) 1.2039(6) 0.0468(17) Uani 1 1 d . . . 
H15A H 0.3213 0.1448 1.2408 0.070 Uiso 1 1 calc R . . 
H15B H 0.1425 0.1580 1.2451 0.070 Uiso 1 1 calc R . . 
H15C H 0.2598 0.2075 1.2207 0.070 Uiso 1 1 calc R . . 
C16 C 0.1741(7) 0.0958(2) 1.0222(6) 0.0323(14) Uani 1 1 d . . . 
H16A H 0.1687 0.0901 0.9268 0.048 Uiso 1 1 calc R . . 
H16B H 0.0754 0.0862 1.0551 0.048 Uiso 1 1 calc R . . 
H16C H 0.2545 0.0719 1.0645 0.048 Uiso 1 1 calc R . . 
 
loop_ 
 _atom_site_aniso_label 
 _atom_site_aniso_U_11 
 _atom_site_aniso_U_22 
 _atom_site_aniso_U_33 
 _atom_site_aniso_U_23 
 _atom_site_aniso_U_13 
 _atom_site_aniso_U_12 
Bi1 0.01999(11) 0.01837(11) 0.02077(11) -0.00058(7) 0.00357(8) -0.00084(7) 
I1 0.0317(2) 0.0296(2) 0.0272(2) 0.00329(15) 0.00062(16) -0.00320(15) 
I2 0.0333(2) 0.0334(2) 0.0261(2) 0.00248(15) -0.00026(16) 0.00196(16) 
O1 0.024(2) 0.0207(18) 0.024(2) -0.0026(15) 0.0051(16) -0.0015(15) 
O2 0.023(2) 0.0218(18) 0.028(2) -0.0029(15) 0.0062(16) -0.0002(15) 
C1 0.019(3) 0.018(2) 0.021(3) 0.000(2) 0.000(2) -0.004(2) 
C2 0.020(3) 0.026(3) 0.025(3) 0.003(2) -0.001(2) -0.004(2) 
C3 0.032(3) 0.031(3) 0.029(3) 0.005(2) 0.006(3) -0.006(2) 
C4 0.038(3) 0.019(3) 0.035(3) 0.002(2) 0.003(3) -0.001(2) 
C5 0.025(3) 0.025(3) 0.030(3) -0.002(2) 0.000(2) 0.000(2) 
C6 0.024(3) 0.023(3) 0.026(3) -0.003(2) 0.001(2) 0.001(2) 
C7 0.025(3) 0.026(3) 0.030(3) -0.001(2) 0.006(2) -0.001(2) 
C8 0.029(3) 0.025(3) 0.021(3) -0.002(2) 0.007(2) 0.001(2) 
C9 0.029(3) 0.025(3) 0.029(3) -0.005(2) 0.005(2) -0.001(2) 
C10 0.030(3) 0.030(3) 0.047(4) -0.001(3) 0.005(3) 0.003(3) 
C11 0.057(4) 0.040(4) 0.020(3) -0.006(3) 0.012(3) -0.008(3) 
C12 0.034(3) 0.032(3) 0.037(3) -0.011(3) 0.010(3) -0.007(3) 
C13 0.021(3) 0.035(3) 0.023(3) -0.004(2) 0.007(2) 0.003(2) 
C14 0.030(3) 0.042(4) 0.037(4) -0.001(3) 0.008(3) 0.005(3) 
C15 0.051(4) 0.063(5) 0.028(3) 0.003(3) 0.009(3) -0.005(4) 
C16 0.029(3) 0.032(3) 0.037(4) 0.003(3) 0.008(3) -0.003(2) 
 
_geom_special_details 
; 
 All esds (except the esd in the dihedral angle between two l.s. planes) 
 are estimated using the full covariance matrix.  The cell esds are taken 
 into account individually in the estimation of esds in distances, angles 
 and torsion angles; correlations between esds in cell parameters are only 
 used when they are defined by crystal symmetry.  An approximate (isotropic) 
 treatment of cell esds is used for estimating esds involving l.s. planes. 
; 
 
loop_ 
 _geom_bond_atom_site_label_1 
 _geom_bond_atom_site_label_2 
 _geom_bond_distance 
 _geom_bond_site_symmetry_2 
 _geom_bond_publ_flag 
Bi1 C1 2.206(5) . ? 
Bi1 O2 2.416(3) . ? 
Bi1 O1 2.430(4) . ? 
Bi1 I2 3.0096(4) . ? 
Bi1 I1 3.1050(4) . ? 
O1 C7 1.425(6) . ? 
O1 C8 1.488(6) . ? 
O2 C12 1.431(6) . ? 
O2 C13 1.492(6) . ? 
C1 C2 1.388(7) . ? 
C1 C6 1.399(7) . ? 
C2 C3 1.394(8) . ? 
C2 C7 1.493(8) . ? 
C3 C4 1.391(8) . ? 
C3 H3 0.9300 . ? 
C4 C5 1.388(8) . ? 
C4 H4 0.9300 . ? 
C5 C6 1.389(8) . ? 
C5 H5 0.9300 . ? 
C6 C12 1.499(8) . ? 
C7 H7A 0.9700 . ? 
C7 H7B 0.9700 . ? 
C8 C10 1.518(8) . ? 
C8 C9 1.519(8) . ? 
C8 C11 1.527(7) . ? 
C9 H9A 0.9600 . ? 
C9 H9B 0.9600 . ? 
C9 H9C 0.9600 . ? 
C10 H10A 0.9600 . ? 
C10 H10B 0.9600 . ? 
C10 H10C 0.9600 . ? 
C11 H11A 0.9600 . ? 
C11 H11B 0.9600 . ? 
C11 H11C 0.9600 . ? 
C12 H12A 0.9700 . ? 
C12 H12B 0.9700 . ? 
C13 C14 1.506(8) . ? 
C13 C15 1.514(8) . ? 
C13 C16 1.521(8) . ? 
C14 H14A 0.9600 . ? 
C14 H14B 0.9600 . ? 
C14 H14C 0.9600 . ? 
C15 H15A 0.9600 . ? 
C15 H15B 0.9600 . ? 
C15 H15C 0.9600 . ? 
C16 H16A 0.9600 . ? 
C16 H16B 0.9600 . ? 
C16 H16C 0.9600 . ? 
 
loop_ 
 _geom_angle_atom_site_label_1 
 _geom_angle_atom_site_label_2 
 _geom_angle_atom_site_label_3 
 _geom_angle 
 _geom_angle_site_symmetry_1 
 _geom_angle_site_symmetry_3 
 _geom_angle_publ_flag 
C1 Bi1 O2 72.29(16) . . ? 
C1 Bi1 O1 71.79(15) . . ? 
O2 Bi1 O1 144.02(12) . . ? 
C1 Bi1 I2 92.85(13) . . ? 
O2 Bi1 I2 91.43(9) . . ? 
O1 Bi1 I2 92.41(9) . . ? 
C1 Bi1 I1 91.94(13) . . ? 
O2 Bi1 I1 89.41(9) . . ? 
O1 Bi1 I1 89.71(9) . . ? 
I2 Bi1 I1 175.163(12) . . ? 
C7 O1 C8 116.7(4) . . ? 
C7 O1 Bi1 116.1(3) . . ? 
C8 O1 Bi1 125.9(3) . . ? 
C12 O2 C13 116.6(4) . . ? 
C12 O2 Bi1 116.3(3) . . ? 
C13 O2 Bi1 127.0(3) . . ? 
C2 C1 C6 121.6(5) . . ? 
C2 C1 Bi1 119.4(4) . . ? 
C6 C1 Bi1 119.0(4) . . ? 
C1 C2 C3 118.4(5) . . ? 
C1 C2 C7 121.2(5) . . ? 
C3 C2 C7 120.3(5) . . ? 
C4 C3 C2 120.5(5) . . ? 
C4 C3 H3 119.7 . . ? 
C2 C3 H3 119.7 . . ? 
C5 C4 C3 120.4(5) . . ? 
C5 C4 H4 119.8 . . ? 
C3 C4 H4 119.8 . . ? 
C4 C5 C6 120.0(5) . . ? 
C4 C5 H5 120.0 . . ? 
C6 C5 H5 120.0 . . ? 
C5 C6 C1 119.0(5) . . ? 
C5 C6 C12 120.0(5) . . ? 
C1 C6 C12 121.0(5) . . ? 
O1 C7 C2 110.3(4) . . ? 
O1 C7 H7A 109.6 . . ? 
C2 C7 H7A 109.6 . . ? 
O1 C7 H7B 109.6 . . ? 
C2 C7 H7B 109.6 . . ? 
H7A C7 H7B 108.1 . . ? 
O1 C8 C10 109.8(4) . . ? 
O1 C8 C9 103.4(4) . . ? 
C10 C8 C9 111.6(5) . . ? 
O1 C8 C11 108.7(4) . . ? 
C10 C8 C11 111.9(5) . . ? 
C9 C8 C11 111.0(5) . . ? 
C8 C9 H9A 109.5 . . ? 
C8 C9 H9B 109.5 . . ? 
H9A C9 H9B 109.5 . . ? 
C8 C9 H9C 109.5 . . ? 
H9A C9 H9C 109.5 . . ? 
H9B C9 H9C 109.5 . . ? 
C8 C10 H10A 109.5 . . ? 
C8 C10 H10B 109.5 . . ? 
H10A C10 H10B 109.5 . . ? 
C8 C10 H10C 109.5 . . ? 
H10A C10 H10C 109.5 . . ? 
H10B C10 H10C 109.5 . . ? 
C8 C11 H11A 109.5 . . ? 
C8 C11 H11B 109.5 . . ? 
H11A C11 H11B 109.5 . . ? 
C8 C11 H11C 109.5 . . ? 
H11A C11 H11C 109.5 . . ? 
H11B C11 H11C 109.5 . . ? 
O2 C12 C6 110.3(4) . . ? 
O2 C12 H12A 109.6 . . ? 
C6 C12 H12A 109.6 . . ? 
O2 C12 H12B 109.6 . . ? 
C6 C12 H12B 109.6 . . ? 
H12A C12 H12B 108.1 . . ? 
O2 C13 C14 108.9(4) . . ? 
O2 C13 C15 109.2(5) . . ? 
C14 C13 C15 111.9(5) . . ? 
O2 C13 C16 103.7(4) . . ? 
C14 C13 C16 111.4(5) . . ? 
C15 C13 C16 111.5(5) . . ? 
C13 C14 H14A 109.5 . . ? 
C13 C14 H14B 109.5 . . ? 
H14A C14 H14B 109.5 . . ? 
C13 C14 H14C 109.5 . . ? 
H14A C14 H14C 109.5 . . ? 
H14B C14 H14C 109.5 . . ? 
C13 C15 H15A 109.5 . . ? 
C13 C15 H15B 109.5 . . ? 
H15A C15 H15B 109.5 . . ? 
C13 C15 H15C 109.5 . . ? 
H15A C15 H15C 109.5 . . ? 
H15B C15 H15C 109.5 . . ? 
C13 C16 H16A 109.5 . . ? 
C13 C16 H16B 109.5 . . ? 
H16A C16 H16B 109.5 . . ? 
C13 C16 H16C 109.5 . . ? 
H16A C16 H16C 109.5 . . ? 
H16B C16 H16C 109.5 . . ? 
 
_diffrn_measured_fraction_theta_max    1.000 
_diffrn_reflns_theta_full              27.46 
_diffrn_measured_fraction_theta_full   1.000 
_refine_diff_density_max    1.670 
_refine_diff_density_min   -1.608 
_refine_diff_density_rms    0.181 
#===END
